# Supplementary material for: Tuning the optoelectronic characteristics of ionic organic crystalline assemblies
Source: Royal Society of Chemistry journal article supplement (doi:10.1039/c8tc00416a), 2018-01-01
Supplement: c8tc00416a1.pdf [file c8tc00416a1.pdf]

## Supporting Information

### **Tuning Optoelectronic Characteristics of Ionic Organic Crystalline Assemblies**

Bryan Borders,<sup>a</sup> Morteza Adinehnia,<sup>a</sup> Bhaskar Chilukuri,<sup>a</sup> Michael Ruf,<sup>b</sup> K. W. Hipps,<sup>a</sup> \* Ursula Mazur<sup>a</sup> \*

<sup>a</sup> Department of Chemistry and Materials Science and Engineering Program, Washington State University, Pullman, WA, 99164-4630, USA

<sup>b</sup> Bruker AXS Inc., Madison, WI, 53711, USA

## X-ray photoelectron spectroscopy (XPS) Measurements

### Experimental

The X-ray photoelectron spectroscopy (XPS) analysis was performed using Kratos Analytical Axis 165 ESCA spectrometer equipped with an Al K $\alpha$  source (energy:1486.6 eV., Linewidth:0.85). The binding energy was referenced to C1s signal at 285 eV. Charging in the sample was neutralized by an electron flood gun (Filament current: 1.78 A, Filament bias: 1.2 V and Charge balance: 2.7 V). CasaXPS (Casa Software Ltd.) was used to quantify the collected spectra. All samples were prepared by embedding a crystalline powder specimen into a thin high purity indium foil pressed on the XPS stub.

### Results

The XPS data for H<sub>2</sub>TMPyP:H<sub>2</sub>TSPP was reported earlier.<sup>1</sup> A high resolution scan of the N 1s region of the H<sub>2</sub>TMPyP:NiTSPP and the H<sub>2</sub>TMPyP:CuTSPP crystals are shown in figures S1 and S2, respectively. The H<sub>2</sub>TMPyP tectons present in both crystal systems have three types of nitrogens. The porphyrin ring has imine (–C=N–) nitrogens with binding energy near 398 eV and the pyrrole (–NH–) nitrogens at 400 eV.<sup>2,3</sup> The four equivalent nitrogens of the *meso* N-methyl-pyridinium substituents appear near 402 eV.<sup>4,5</sup> Both the NiTSPP and the CuTSPP have four equivalent nitrogens each with binding energy near 398.5 eV<sup>6</sup>. The ratio of the areas under the three nitrogen peaks in figures S1 and S3 are 6:4:2 (right to left peaks). In Figure S3 the nickel Ni 2p<sub>1/2</sub> signal in the H<sub>2</sub>TMPyP:NiTSPP crystals is at 870 eV. Two small features that appear at 862 eV and 876 eV are satellites peaks, respectively, from Ni 2p<sub>3/2</sub> and Ni 2p<sub>1/2</sub>. In Figure S4 the Cu 2p<sub>3/2</sub> signal is at 933 eV and Cu 2p<sub>1/2</sub> peak appears at 953 eV. A strong Cu 2p<sub>3/2</sub> satellite peak is observed at 942 eV.<sup>7</sup> A Cu2p<sub>1/2</sub> satellite peak which typically appears at 962 eV is not shown in the figure.

The XPS quantification measurements corroborate a 1:1 ionic tecton composition for both the H<sub>2</sub>TMPyP:NiTSPP and the H<sub>2</sub>TMPyP:CuTSPP crystals. See Table S1 for details.

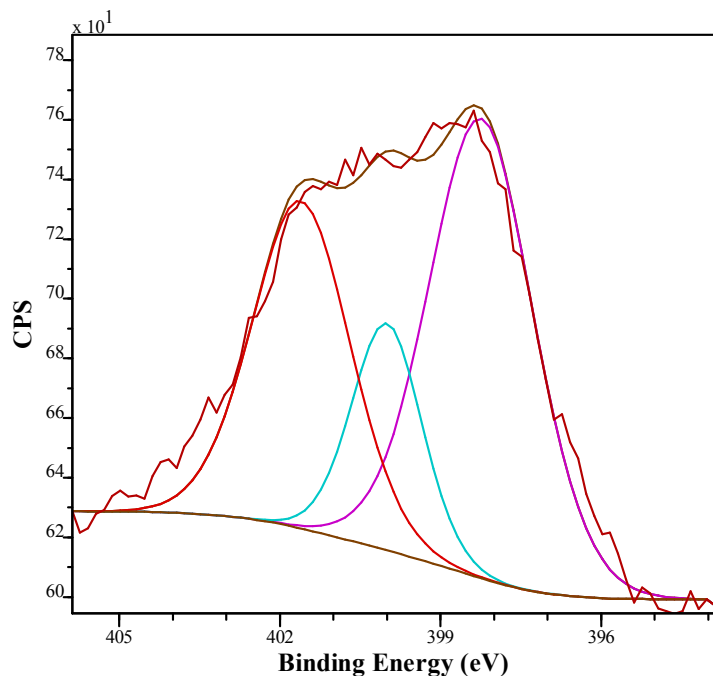

**Fig. S1** High resolution XPS spectrum of N 1s peaks of H<sub>2</sub>TMPyP:NiTSPP, showing a 6:4:2 ratio of Ni-N and imine: pyrrole: N-methyl-pyridinium nitrogens.

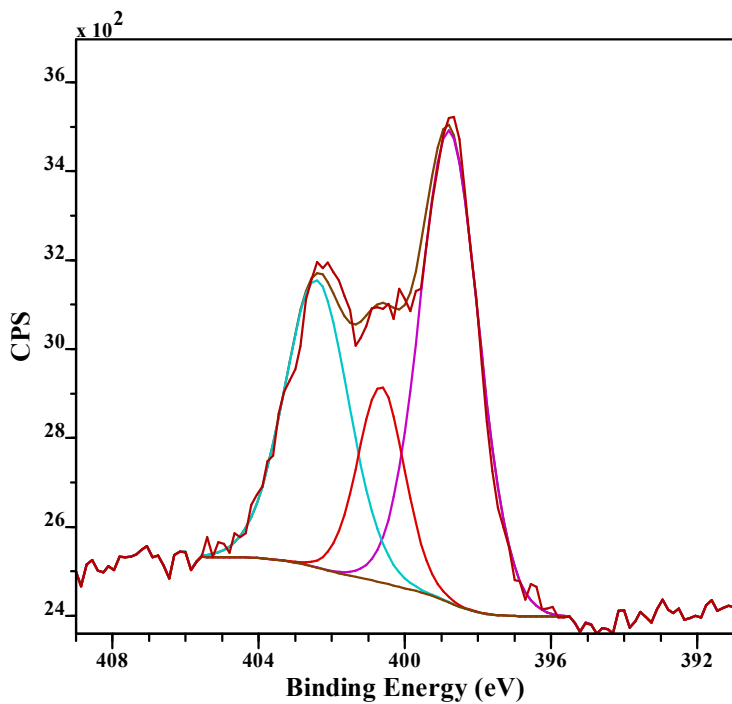

**Fig. S2** High resolution XPS spectrum of N 1s peaks of H<sub>2</sub>TMPyP:CuTSPP, showing a 6:4:2 ratio of Cu-N and imine: pyrrole: N-methyl-pyridinium nitrogens.

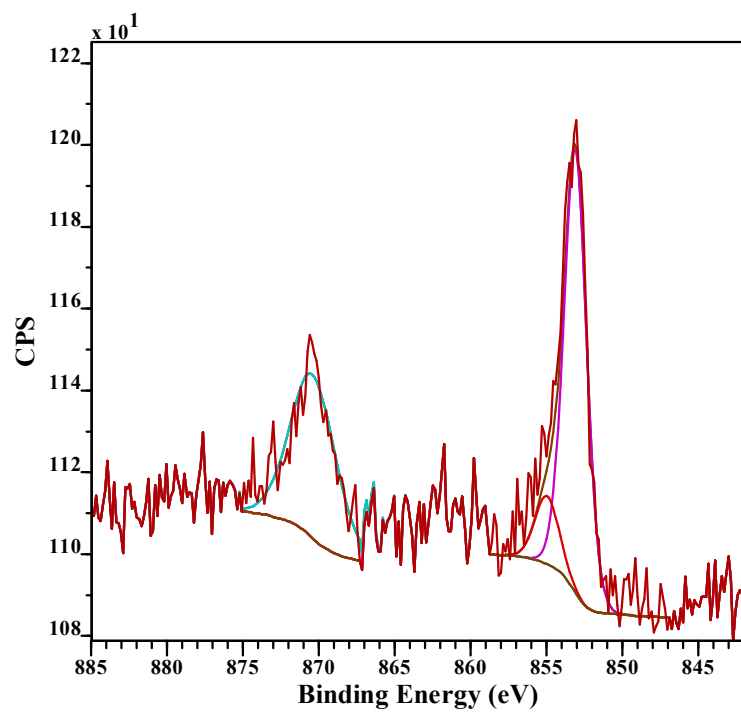

**Fig. S3** High resolution XPS spectrum of Ni 2p of H<sub>2</sub>TMPyP:NiTSPP.

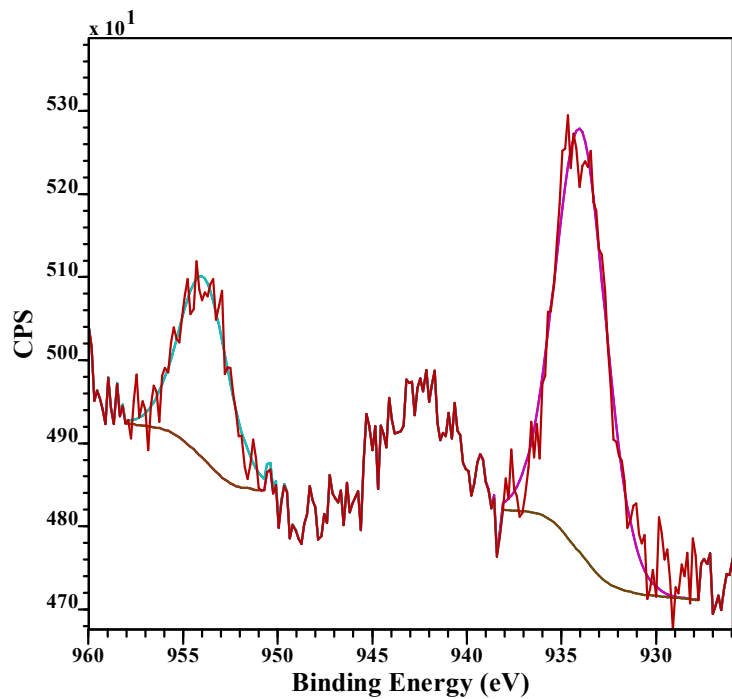

**Fig. S4** High resolution XPS spectrum of Cu 2p in H<sub>2</sub>TMPyP:CuTSPP.

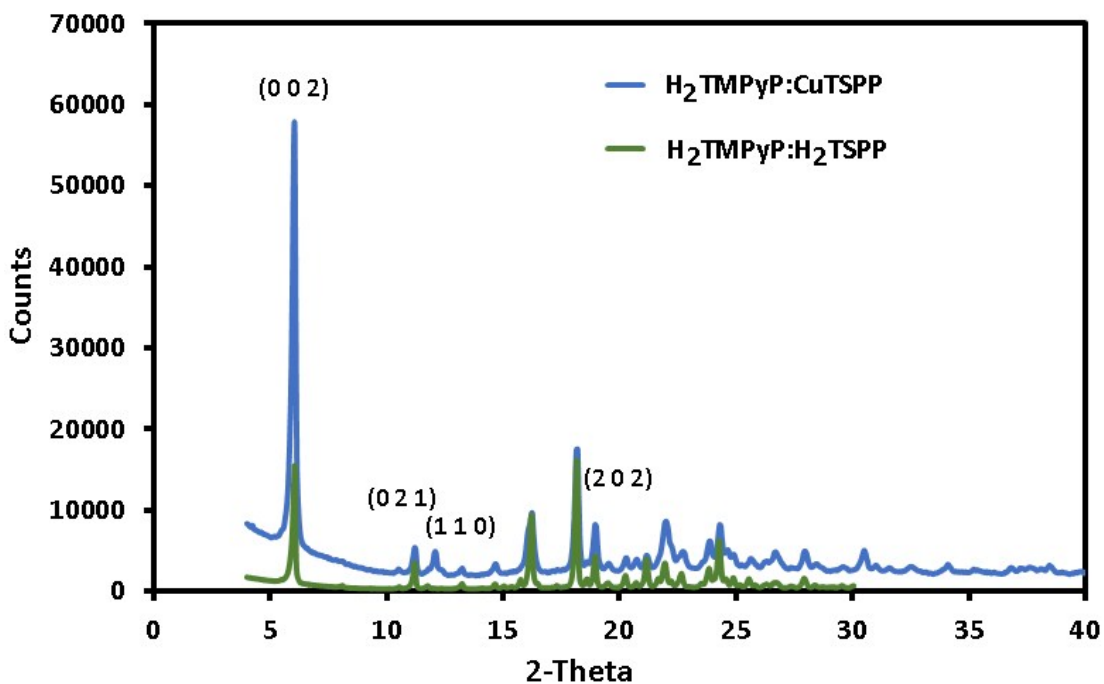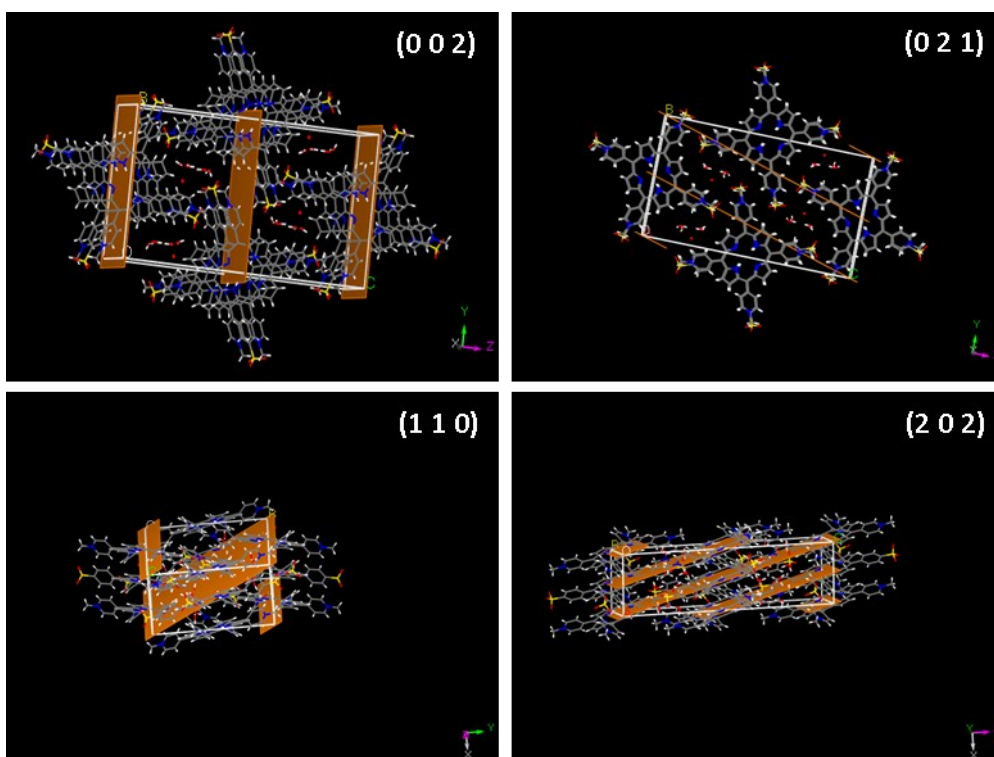

**Fig. S5** Top figure compares peak intensities of the XRDs obtained from the metallated and free-base crystals. Although both patterns are nearly identical, the intensities of some peaks are different. This is particularly apparent for the case of the crystalline planes, shown in the lower figure, which include the (0 0 2), (0 2 1), (1 1 0), and (2 0 2) containing all or some of the tecton metal atoms which have a higher atomic scattering factor intense.

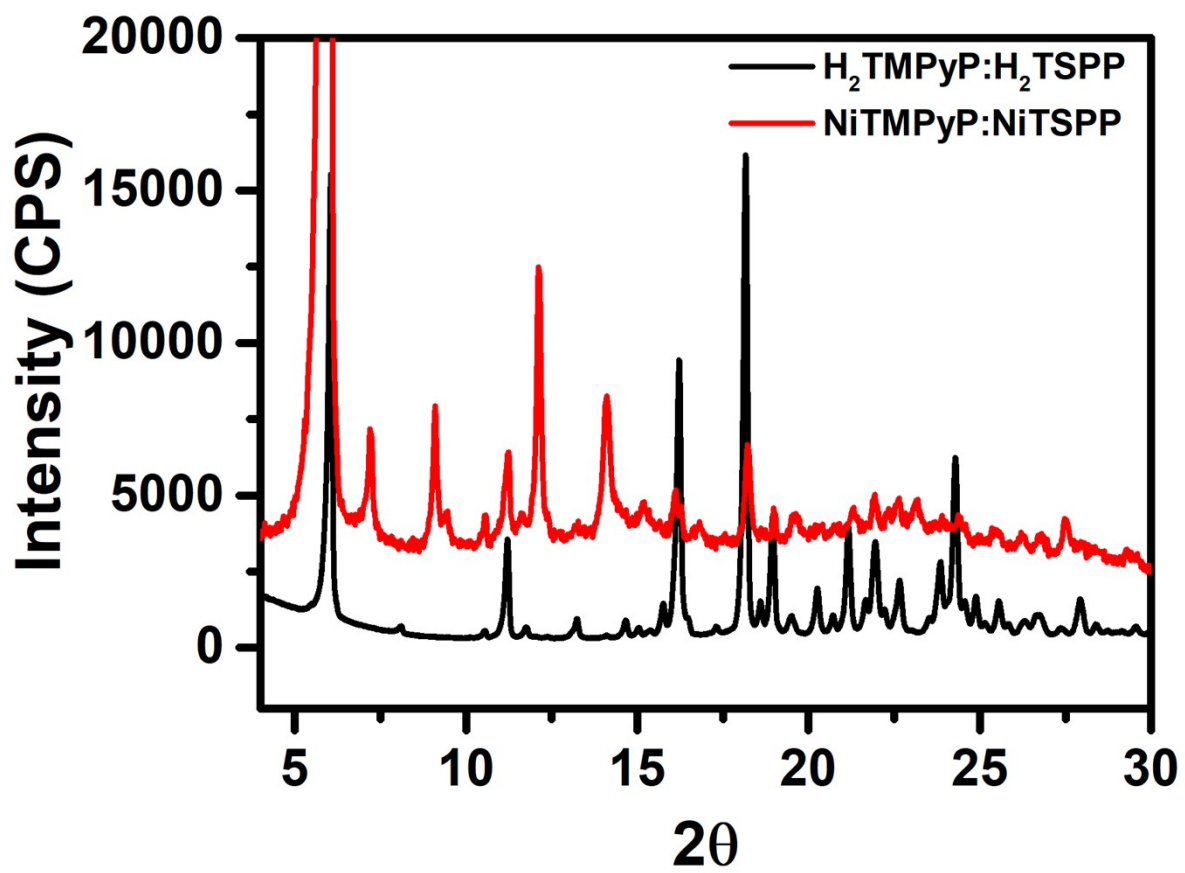

**Fig. S6** Comparison of powder XRD patterns obtained from H<sub>2</sub>TMPyP:H<sub>2</sub>TSPP and NiTMPyP:NiTSPP crystals.

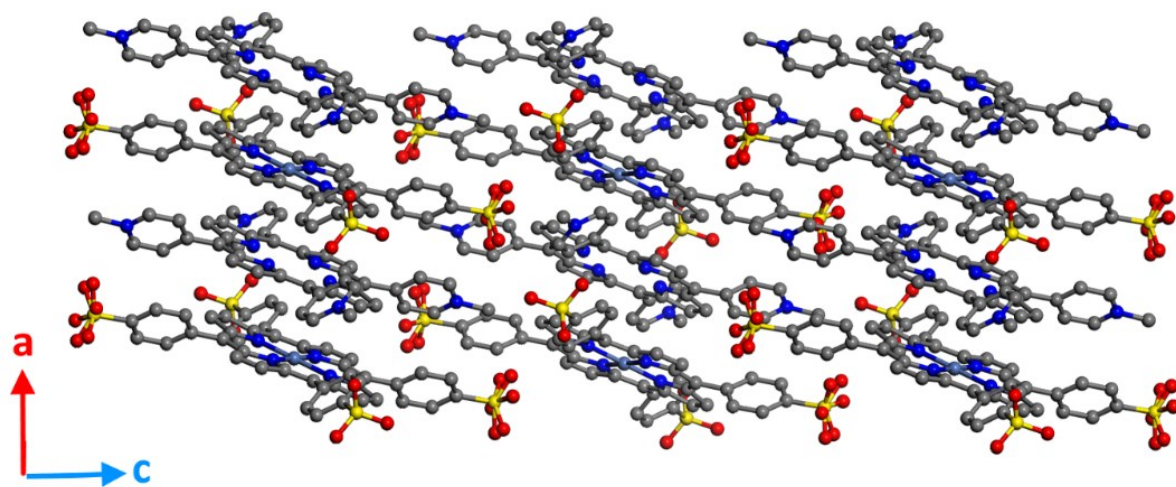

**Fig. S7** Crystal structure of the  $\text{H}_2\text{TMPyP}:\text{NiTSPP}$  nanorods in the direction normal to the crystallographic  $b$  axis, showing alternating  $[\text{H}_2\text{TMPyP}]^{4+}$  and  $[\text{NiTSPP}]^{4-}$  porphyrin tectons within the columns. Color codes: blue, N; grey, C, yellow; S; red, O (hydrogens not shown). Waters within the columns are not shown.

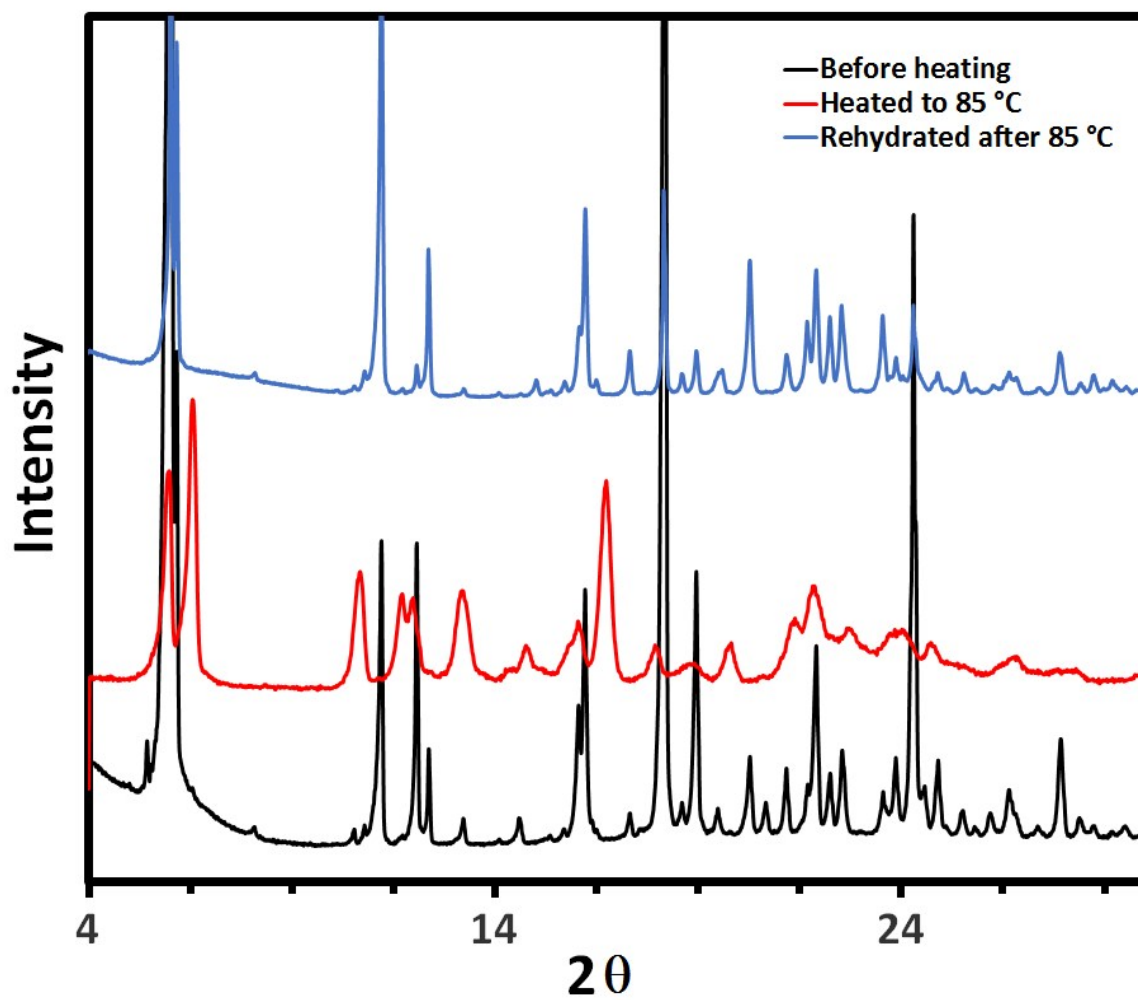

**Fig. S8** Comparison of the powder XRD patterns obtained from a  $H_2TMPyP: NiTSPP$  sample before heating (black), after heating to 85 °C (red) and after rehydration of the crystals (blue).



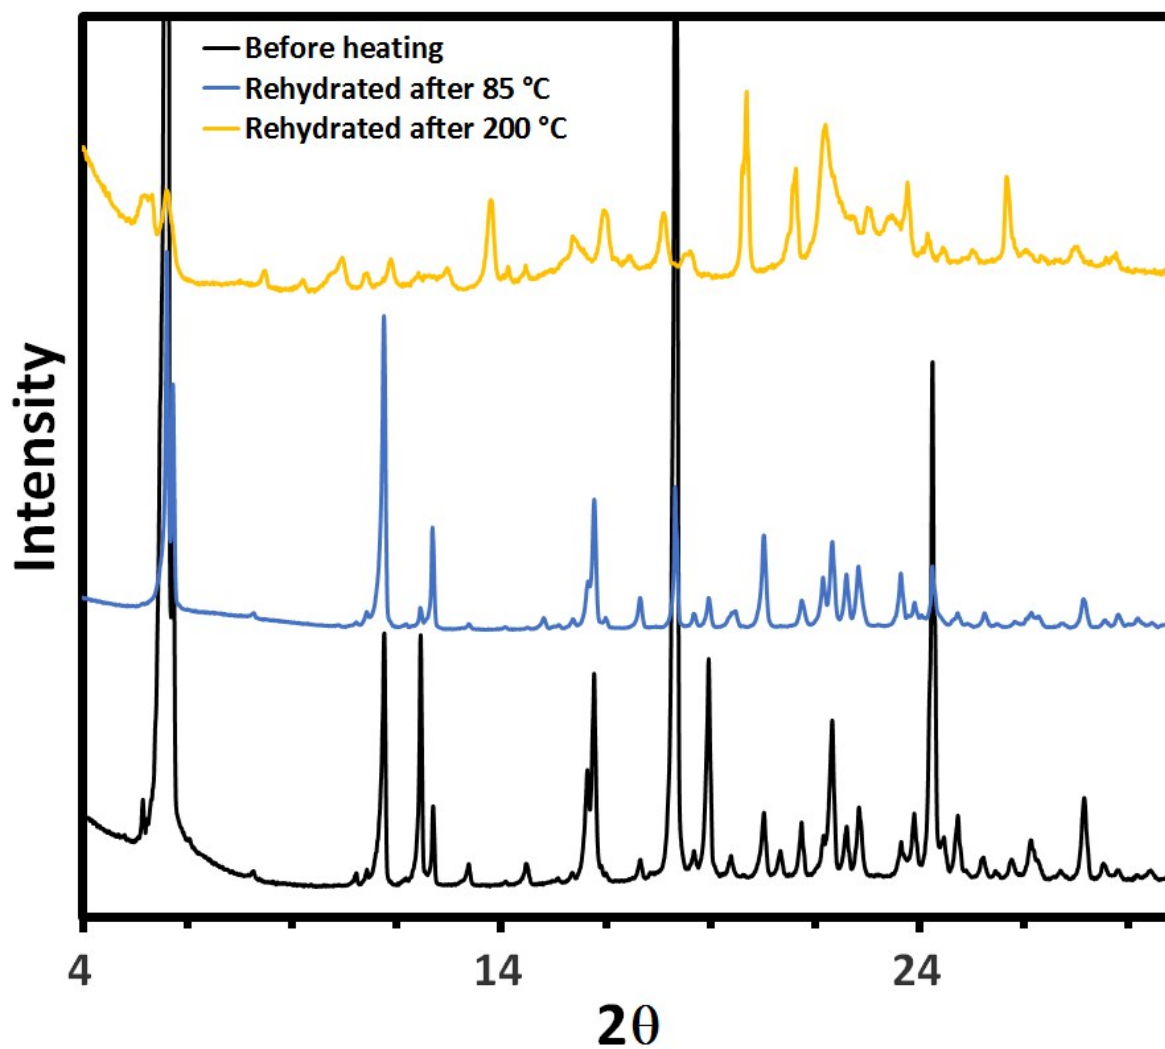

**Fig. S9** Comparison of the powder XRD patterns obtained from a H<sub>2</sub>TMPyP:NiTSPP sample before heating (black), after heating to 85 °C and rehydration (blue) and after heating to 200 °C and rehydration after rehydration of the crystals (yellow).

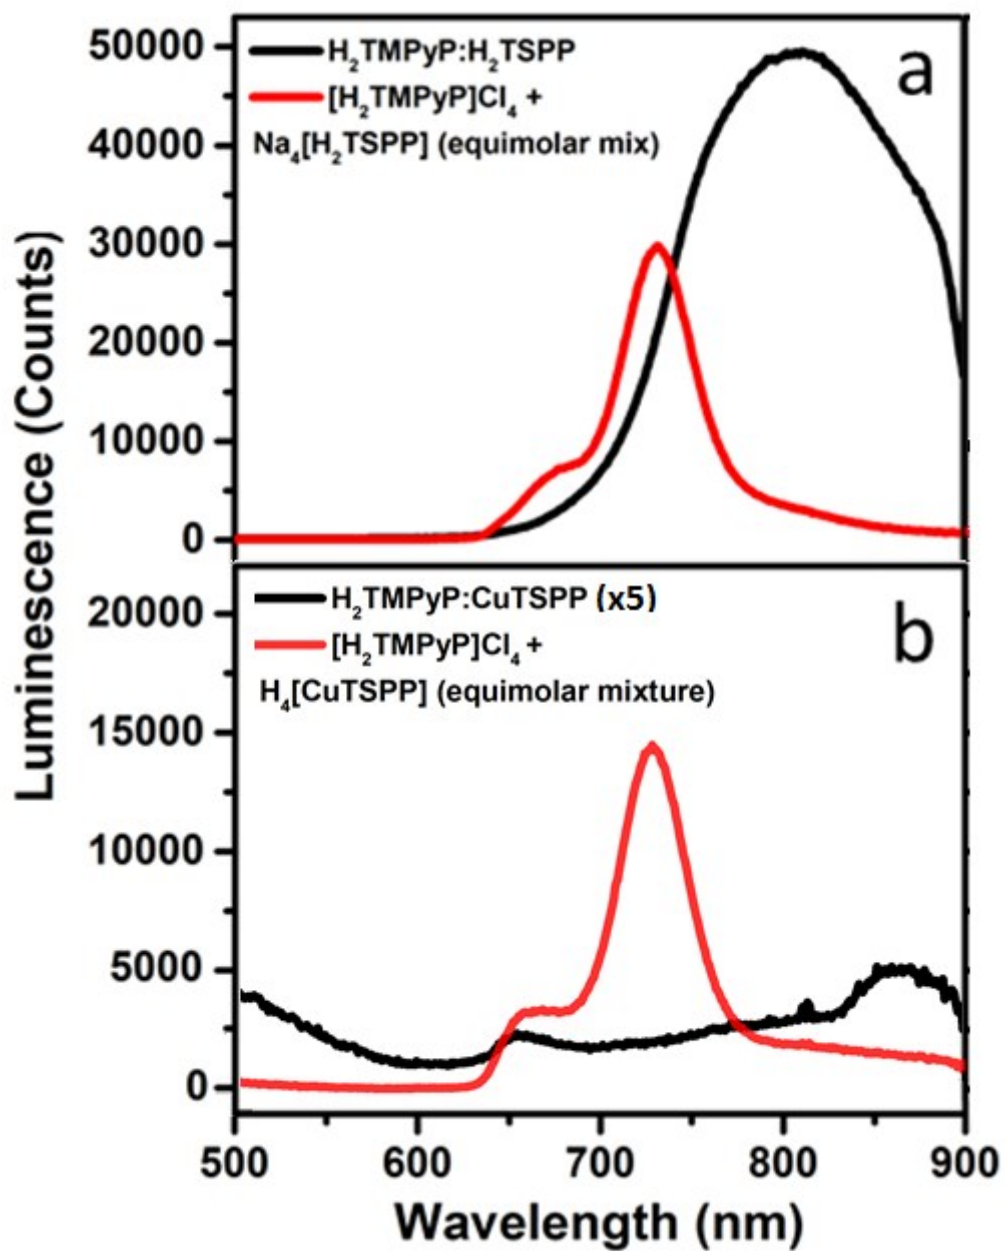

**Fig. S10** Luminescence spectra of the free base (a) and Cu based (b) ISA crystals (black) and equimolar mixtures of the monomer starting materials (red).

**H<sub>2</sub>TMPyP:H<sub>2</sub>TSPP**

**H<sub>2</sub>TMPyP:CuTSPP**

**CuTMPyP:H<sub>2</sub>TSPP**

**H<sub>2</sub>TMPyP:NiTSPP**

**NiTMPyP:H<sub>2</sub>TSPP**

**Fig. S11** Current-voltage characteristics of different ISA crystals acquired at 25 °C. Illumination curves were collected under 8 mW laser power.

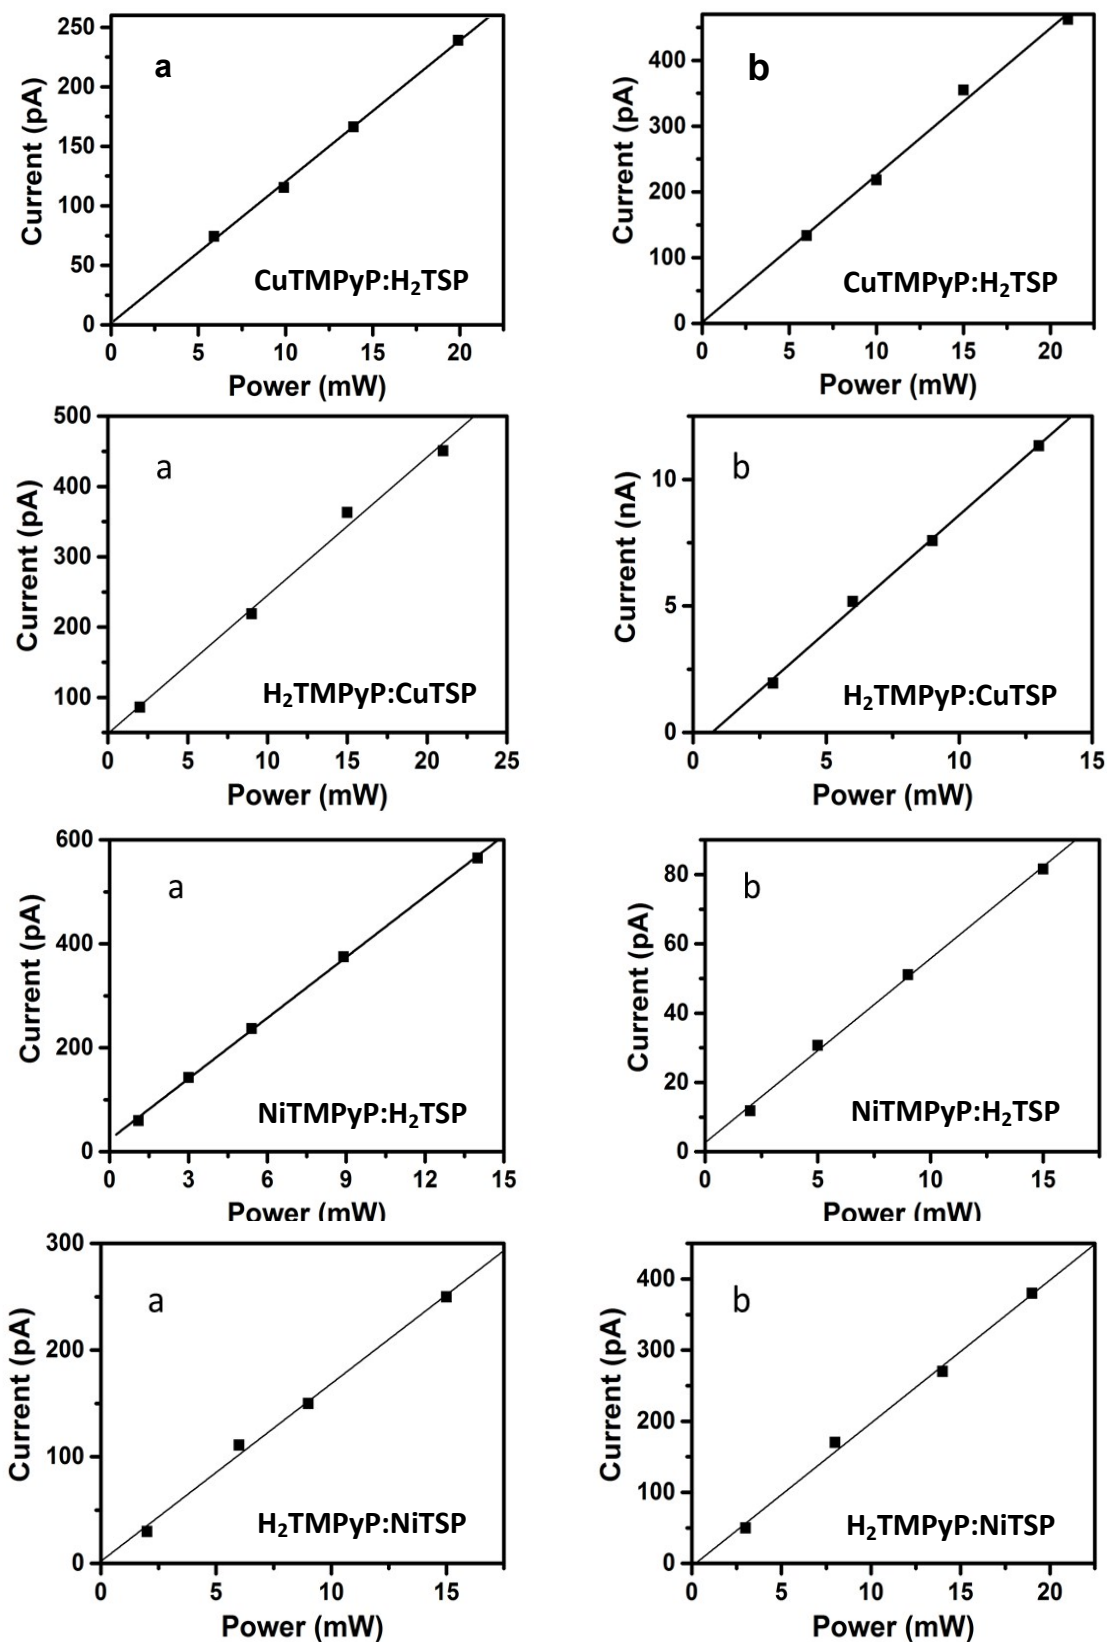

**Fig. S12** Power dependence of photocurrent for copper and nickel ISAs with (a) 671 nm excitation and (b) 445 nm excitation.

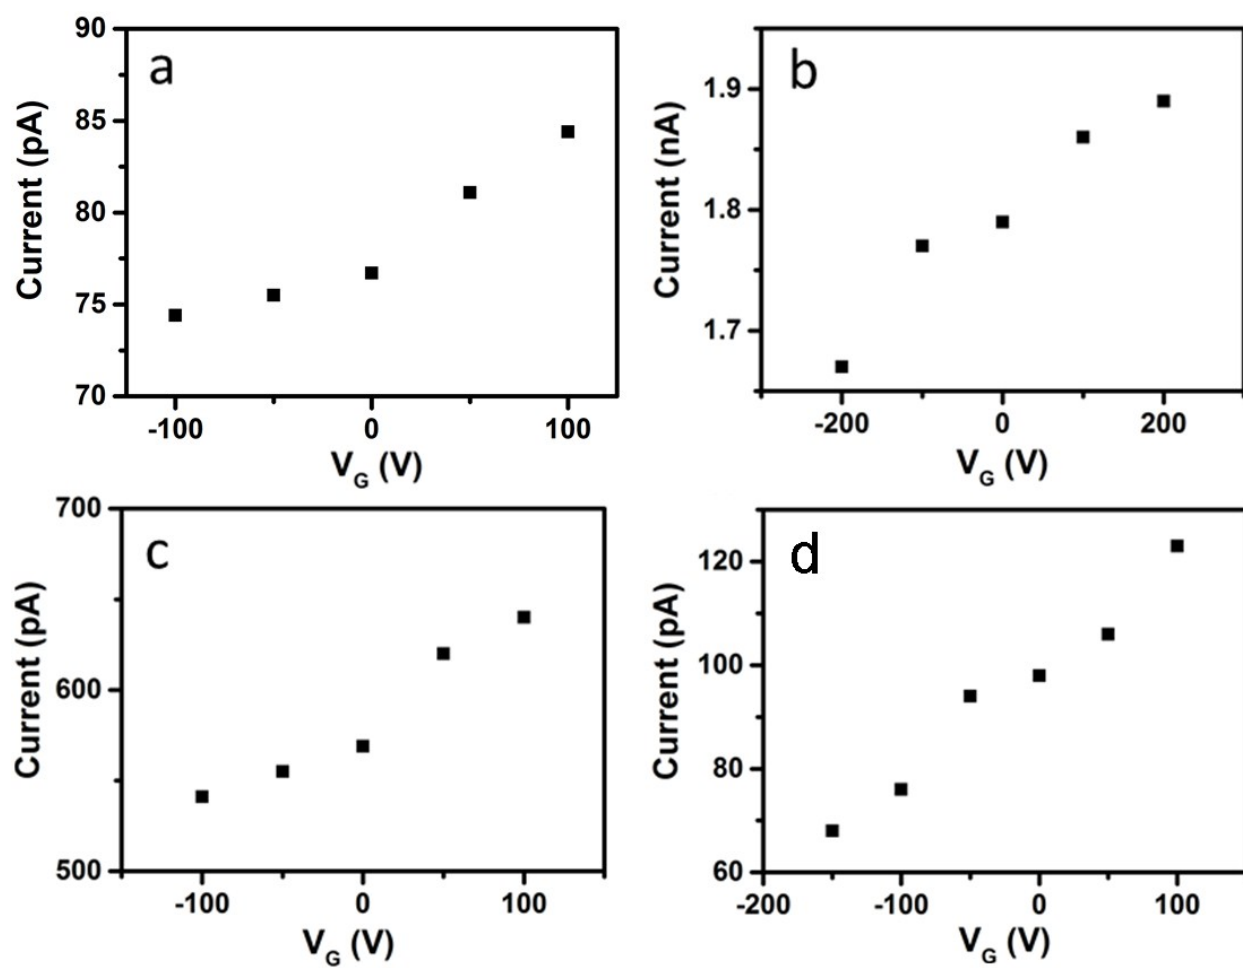

**Fig. S13** Gate voltage dependence of the conductivity of (a) NiTMPyP:H<sub>2</sub>TSPP, (b) H<sub>2</sub>TMPyP:CuTSPP, (c) NiTMPyP:H<sub>2</sub>TSPP and (d) H<sub>2</sub>TMPyP:NiTSPP.

a

b

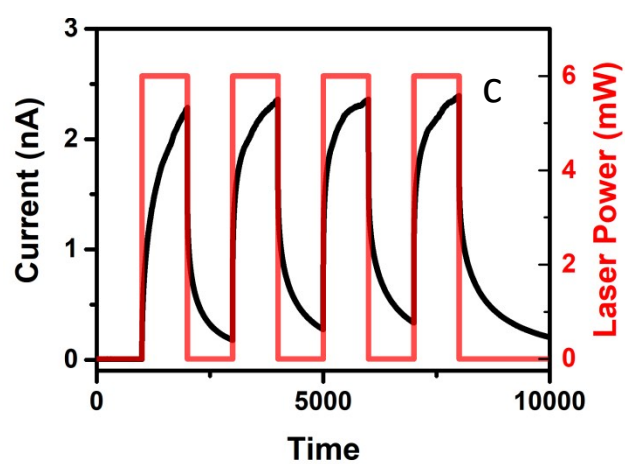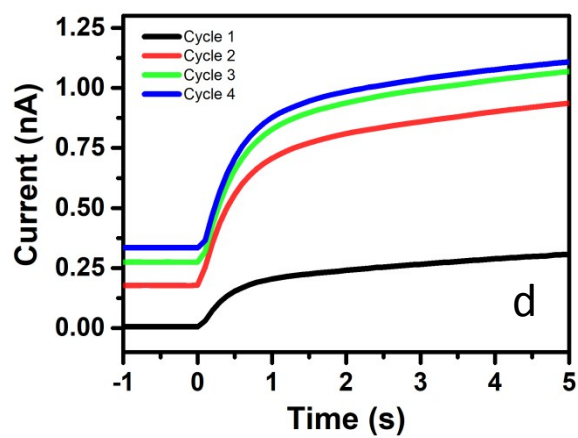

**Fig. S14** H<sub>2</sub>TMPyP:CuTSPP photoresponse under cycled illumination with: (a) and (b) 406 nm laser light; (c) and (d) 671 nm laser light.

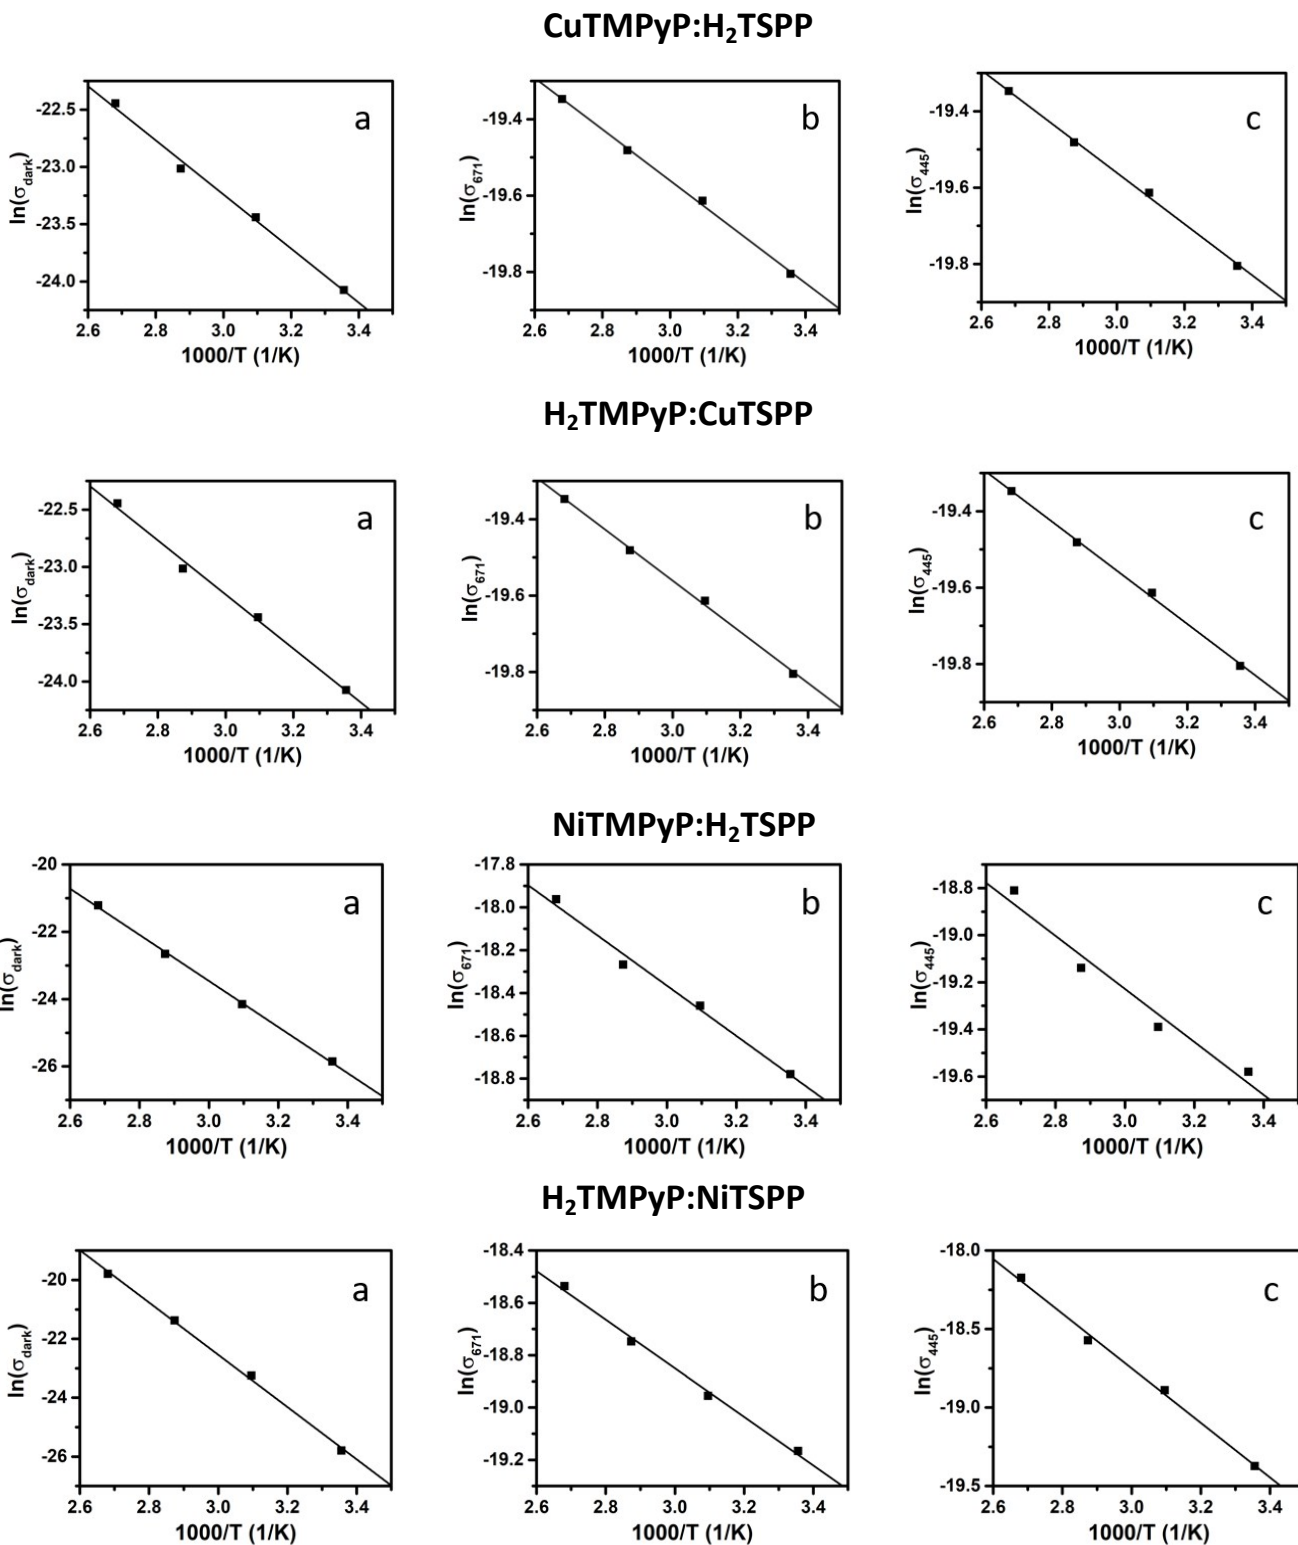

**Fig. S15** Temperature dependence of the conductivity of ISA porphyrin rods (a) in the dark, (b) under 445 nm excitation and (c) under 671 nm excitation. All data was collected with a 5 V bias under  $1 \text{ W}\cdot\text{cm}^{-2}$  illuminati

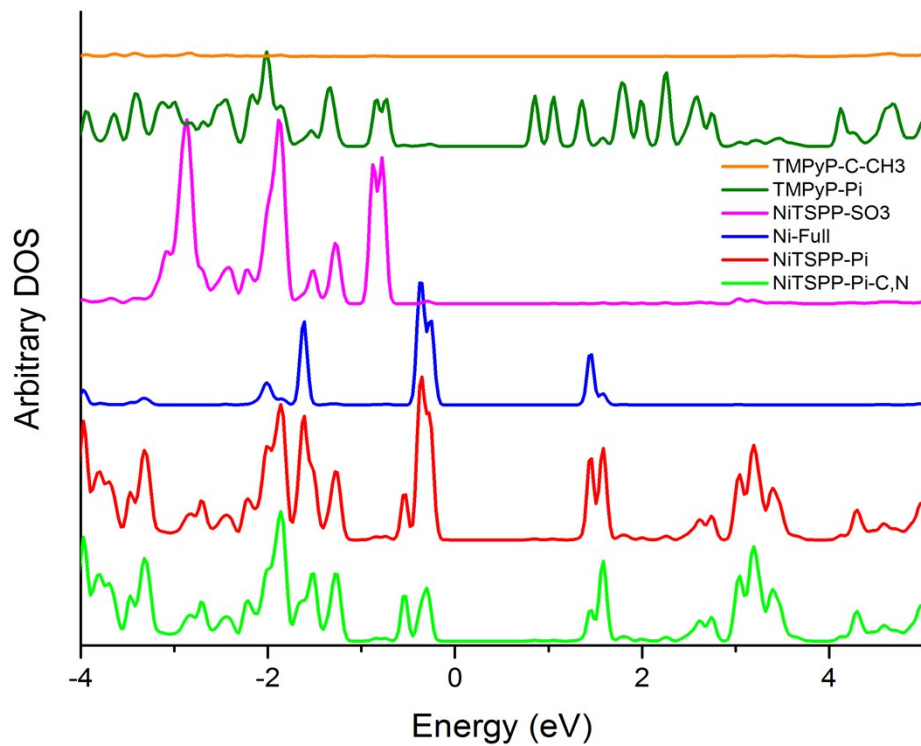

**Fig. S16** Projected density of states (pDOS) of H<sub>2</sub>TMPyP:NiTSPP crystal from DFT.

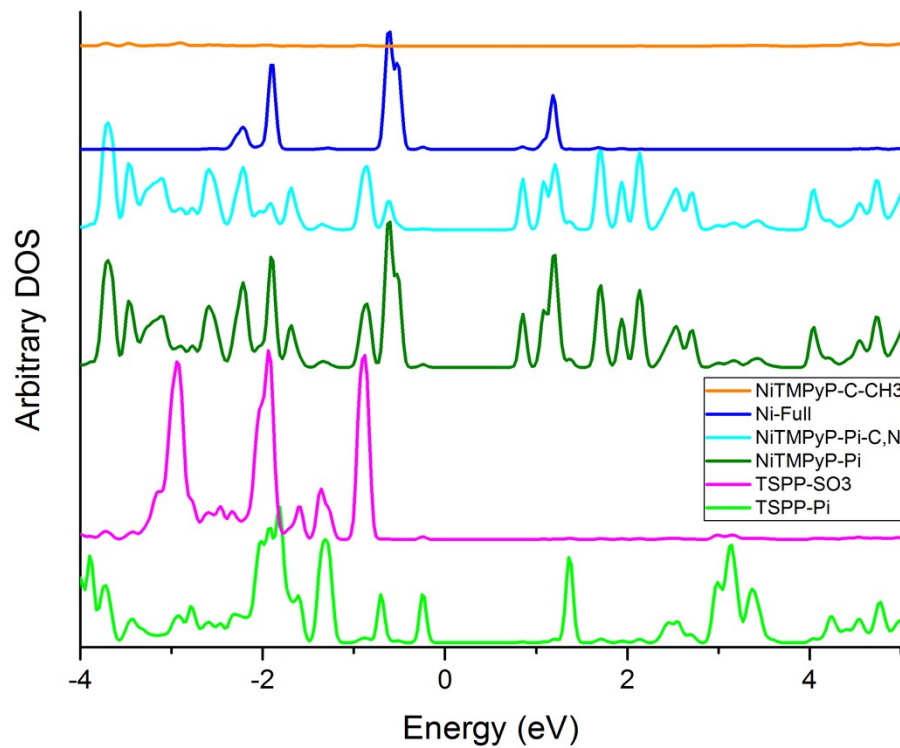

**Fig. S17** Projected density of states (pDOS) of NiTMPyP:H<sub>2</sub>TSPP crystal from DFT.



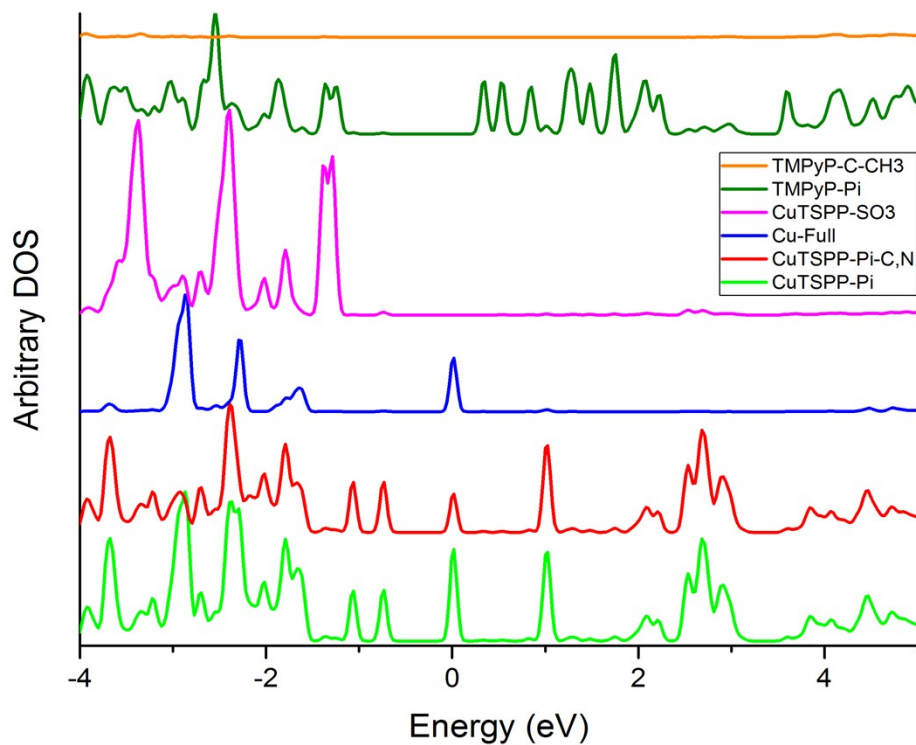

**Fig. S18** Projected density of states (pDOS) of  $H_2TMPyP:CuTSPP$  crystal from DFT.

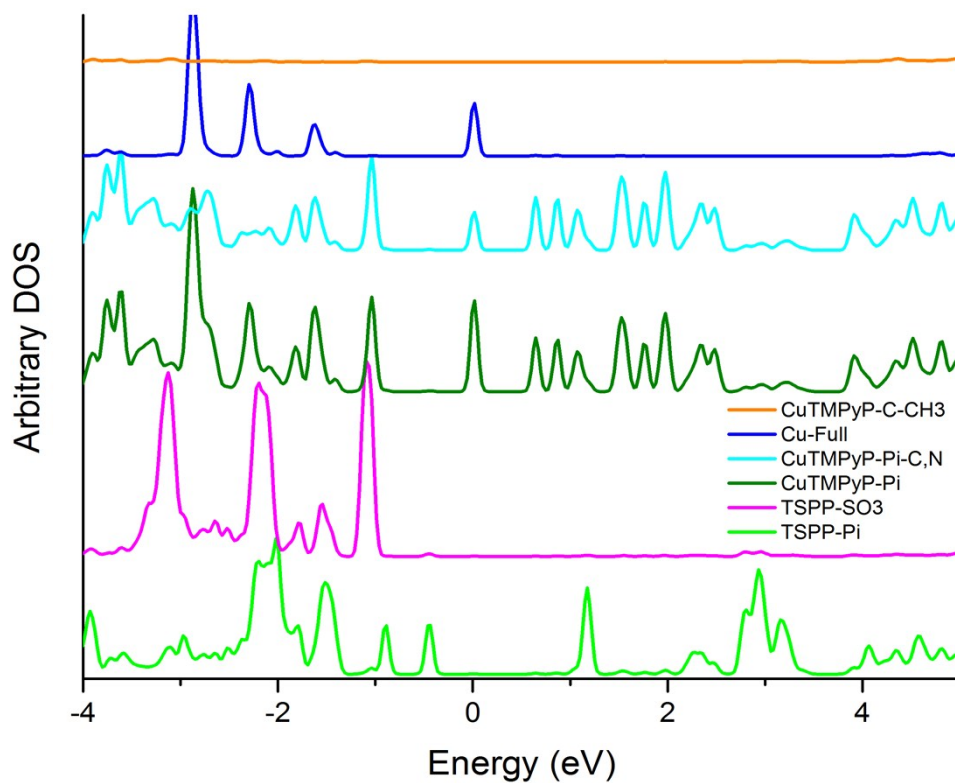

**Fig. S19** Projected density of states (pDOS) of  $CuTMPyP:H_2TSPP$  crystal from DFT.

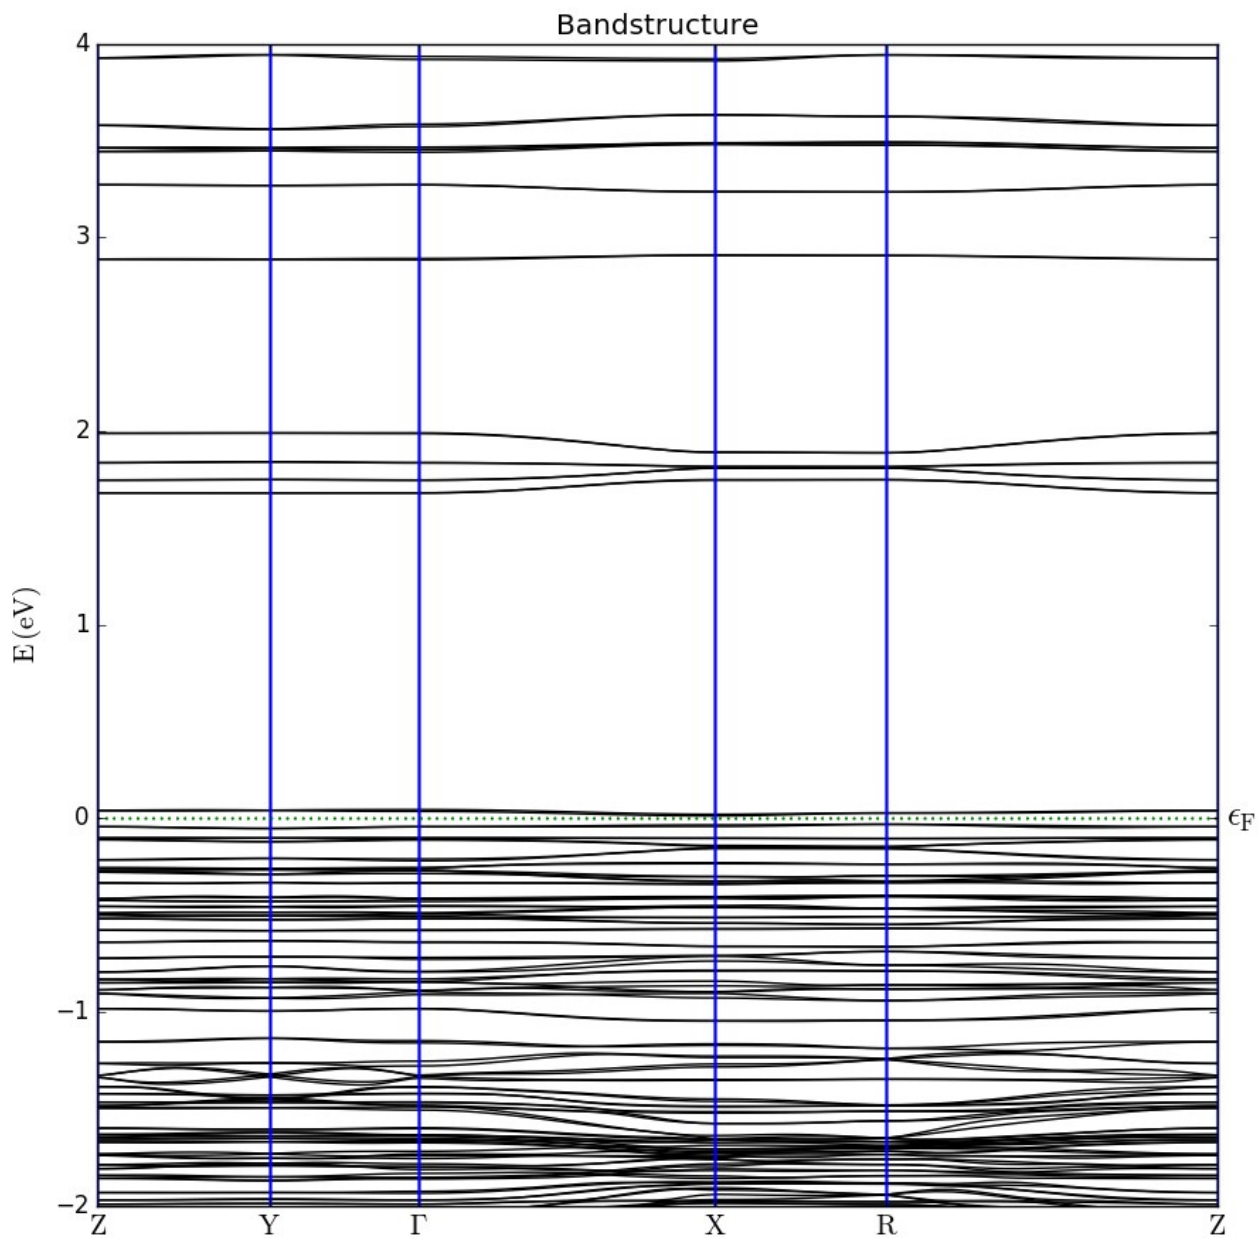

**Fig. S20** Band structure of  $\text{H}_2\text{TMPyP:NiTSPP}$  crystal from EHTB. Fermi level ( $E_f$ ) is located at zero. The high symmetry points the Brillouin zone are as follows,  $\Gamma = (0,0,0)$ ,  $Z = (0,0,0.5)$ ,  $Y = (0,0.5,0)$ ,  $X = (0.5,0,0)$ ,  $R = (0.5,0.5,0.5)$ .

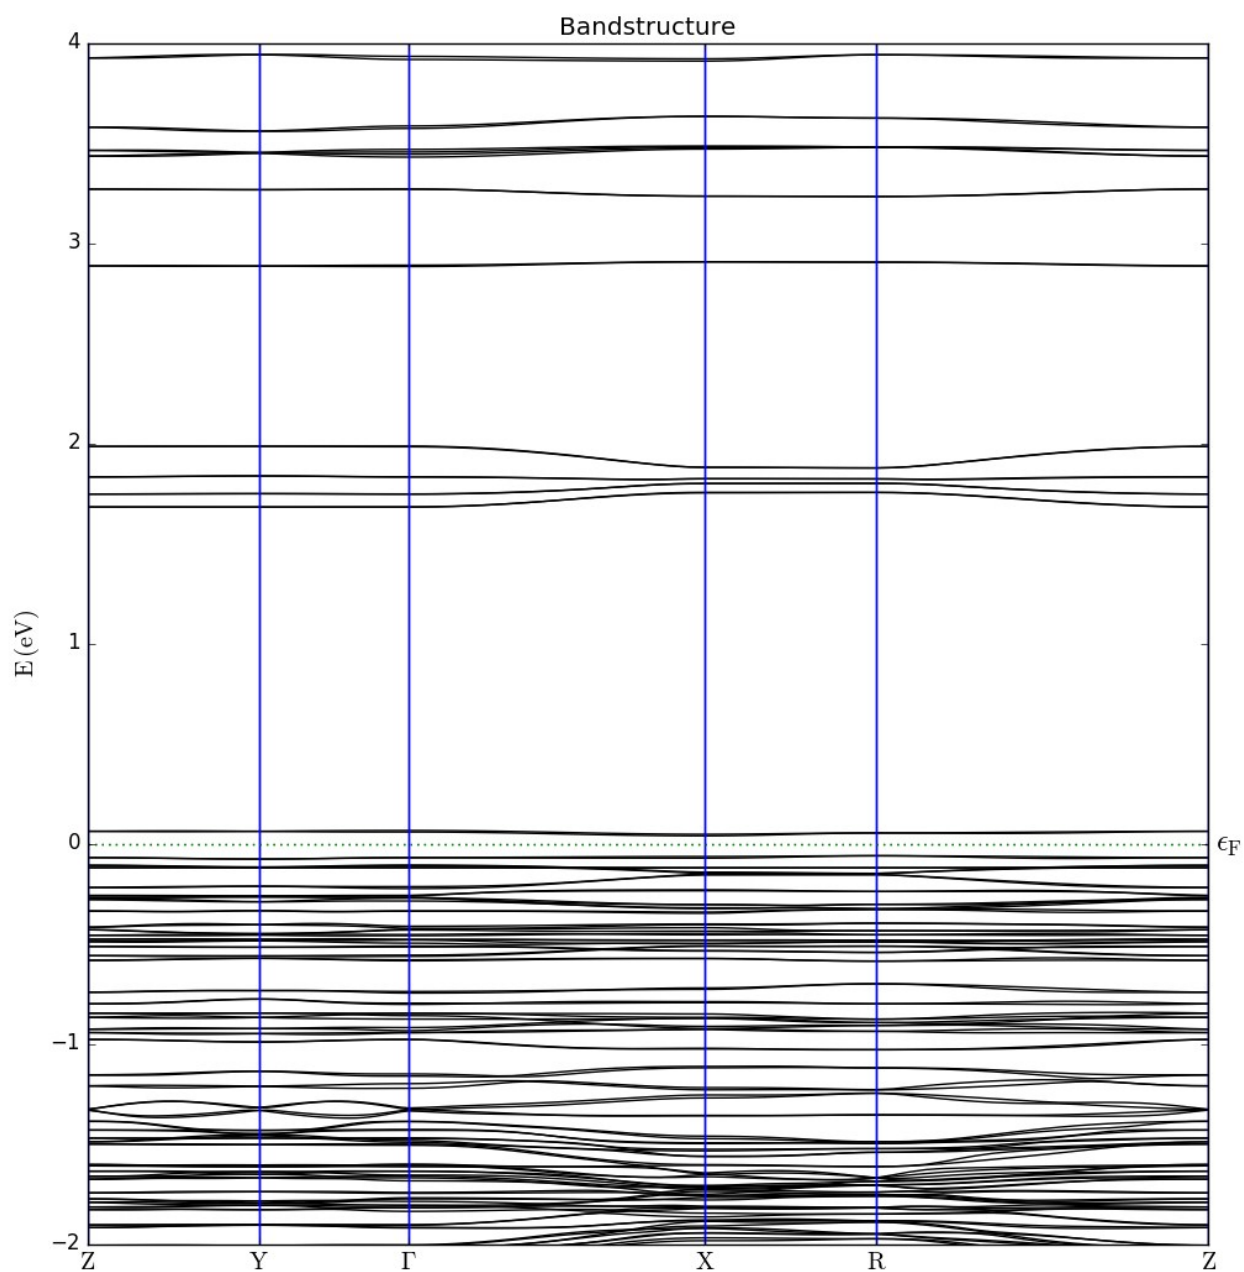

**Fig. S21** Band structure of NiTMPyP:H<sub>2</sub>TSPP crystal from EHTB. Fermi level ( $E_f$ ) is located at zero. The high symmetry points the Brillouin zone are as follows,  $\Gamma = (0,0,0)$ , Z = (0,0,0.5), Y = (0,0.5,0), X = (0.5,0,0), R = (0.5,0.5,0.5).

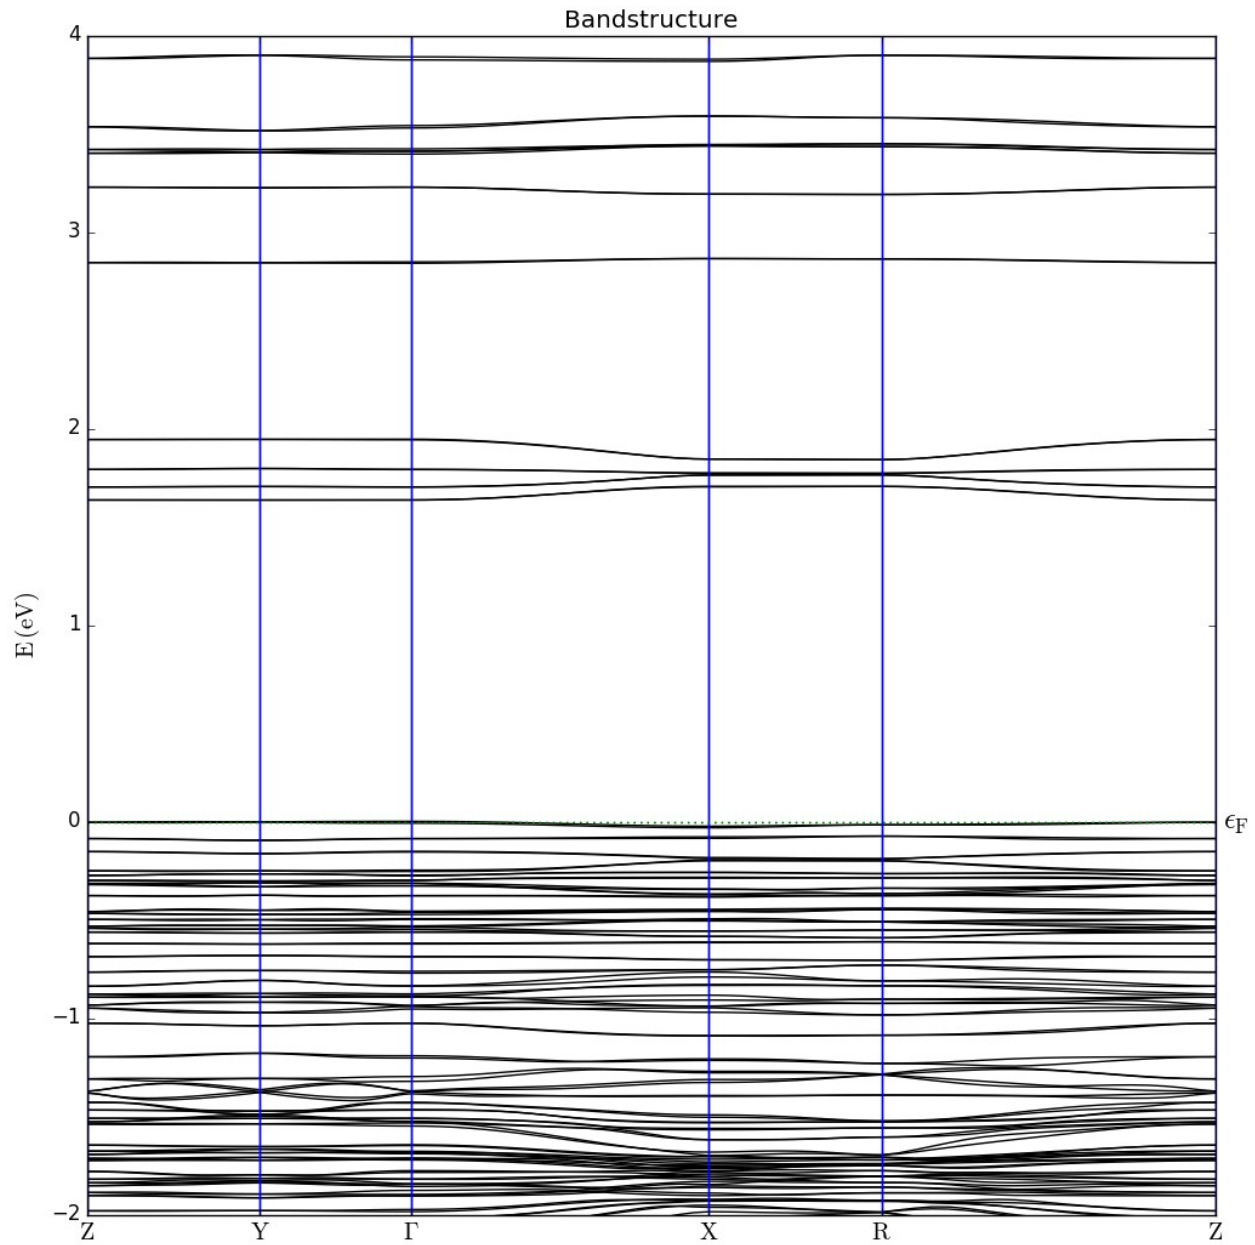

**Fig. S22** Band structure of  $H_2TMPyP:CuTSPP$  crystal from EHTB. Fermi level ( $E_f$ ) is located at zero. The high symmetry points the Brillouin zone are as follows,  $\Gamma = (0,0,0)$ ,  $Z = (0,0,0.5)$ ,  $Y = (0,0.5,0)$ ,  $X = (0.5,0,0)$ ,  $R = (0.5,0.5,0.5)$ .

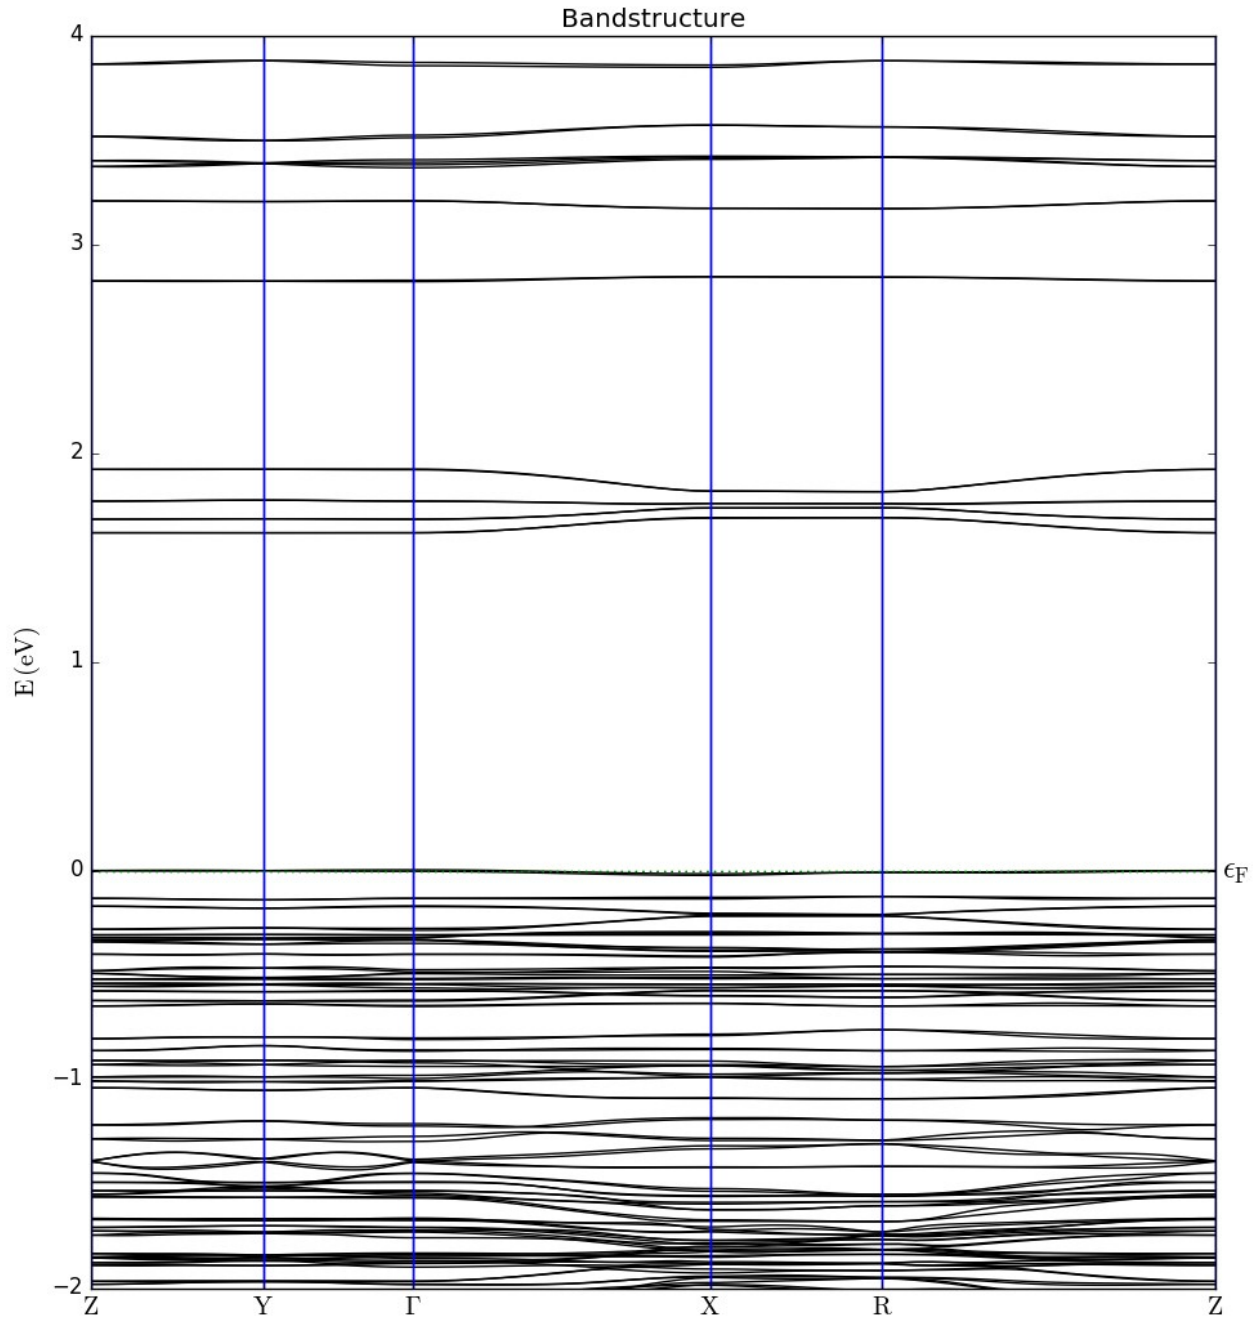

**Fig. S23** Band structure of CuTMPyP:H<sub>2</sub>TSPP crystal from EHTB. Fermi level ( $E_f$ ) is located at zero. The high symmetry points the Brillouin zone are as follows,  $\Gamma = (0,0,0)$ , Z = (0,0,0.5), Y = (0,0.5,0), X = (0.5,0,0), R = (0.5,0.5,0.5).

### Resistivity Calculation.

$$\sigma = \frac{l}{AR} = \frac{Il}{VA}$$

*R*: resistance

*V*: sample bias

*I*: sample current

*A*: cross sectional area of crystalline rods

*l*: length of the IDE spacing

### Photoresistivity Calculation.

$$\sigma = R \frac{A}{l} = \frac{VA}{Il}$$

*R*: resistance measured under 1.0 W/cm<sup>2</sup> illumination.

*V*: sample bias

*I*: sample current

*A*: cross sectional area of crystalline rods

*l*: length of the IDE spacing

The cross sectional area (*A*) was calculated using the aspect ratios of the ISA crystals obtained from microscopic data and the number of electrical connections the rods made with the IDE (from AFAM images). Length is the spacing between the IDE electrodes.

*V* and *I* were obtained from photoconductivity measurements.

## XRD

The total exposure time was 48.73 hours with the temperature maintained at  $100 \pm 2$  °C. The frames were integrated with the Bruker SAINT software package using a narrow-frame algorithm. The integration of the data using a monoclinic unit cell yielded a total of 52269 reflections to a maximum  $\theta$  angle of  $45.98^\circ$  (0.82 Å resolution), of which 7520 were independent (average redundancy 6.951, completeness = 99.2%,  $R_{\text{int}} = 7.77\%$ ,  $R_{\text{sig}} = 5.59\%$ ) and 5963 (75.70%) were greater than  $2\sigma(F_2)$ . The final cell constants are based on the refinement of the XYZ-centroid of 9922 reflections above  $20\sigma(I)$  with  $5.280^\circ < 2\theta < 109.7^\circ$ . Data were corrected for absorption effects using the Multi-Scan method (SADABS). The ratio of minimum to maximum transmission was 0.788. SHELXT-2014/15 software<sup>8</sup> was used for structure solutions and APEX3 v2016.1-0 (Bruker AXS, Inc.) was used for cell refinement computation.

**Table S1. XPS based and calculated atomic ratios for 1:1 tecton stoichiometry for metallated porphyrin crystals.**

| Atomic ratios | H <sub>2</sub> TMPyP:NiTSP |       | H <sub>2</sub> TMPyP:CuTSP |       |
|---------------|----------------------------|-------|----------------------------|-------|
|               | Calculated                 | XPS   | Calculated                 | XPS   |
| S/N           | 0.33                       | 0.35  | 0.33                       | 0.33  |
| Ni/N          | 0.083                      | 0.076 | --                         | --    |
| Cu/N          | --                         | --    | 0.083                      | 0.080 |

| <b>Table S2. Data collection and structure refinement parameters from XRD experiment of H<sub>2</sub>TMPyP:NiTSP nanorods</b> |                                                                                              |
|-------------------------------------------------------------------------------------------------------------------------------|----------------------------------------------------------------------------------------------|
| <b>Parameter Type</b>                                                                                                         | <b>Parameter Value</b>                                                                       |
| Teta range for data collection                                                                                                | 2.64 to 54.98°                                                                               |
| Index ranges                                                                                                                  | -10≤h≤8, -19≤k≤19, -35≤l≤34                                                                  |
| Reflections collected                                                                                                         | 52269                                                                                        |
| Independent reflections                                                                                                       | 7520 [R <sub>int</sub> = 0.0777]                                                             |
| Coverage of independent reflections                                                                                           | 99.2%                                                                                        |
| Absorption correction                                                                                                         | Multi-Scan                                                                                   |
| Refinement method                                                                                                             | Full-matrix least squares on F <sup>2</sup>                                                  |
| Refinement program                                                                                                            | SHELXL-2014/7 (Sheldrick) <sup>9</sup>                                                       |
| Function minimized                                                                                                            | $\sum w(F_o^2 - F_c^2)^2$                                                                    |
| Data / restraints / parameters                                                                                                | 7520 / 117 / 650                                                                             |
| Goodness-of-fit on F <sup>2</sup>                                                                                             | 1.061                                                                                        |
| $\Delta/\sigma_{\max}$                                                                                                        | 0.005                                                                                        |
| Final R indices                                                                                                               | 5693 data; $l > 2\sigma(l)$ R1 = 0.0542, wR2 = 0.01444<br>All data R1 = 0.0792, wR2 = 0.1574 |
| Weighting scheme                                                                                                              | $W = 1/[\sigma^2(F_o^2) + (0.0832P)^2 + 3.4525P]$<br>Where $P = (F_o^2 + 2F_c^2)/3$          |
| Largest diff. peak and hole                                                                                                   | 1.052 and -0.610 eÅ <sup>-3</sup>                                                            |
| R.M.S. deviation from mean                                                                                                    | 0.078 eÅ <sup>-3</sup>                                                                       |



**Table S3. Atomic coordinates and equivalent isotropic atomic displacement parameters ( $\text{\AA}^2$ ) for  $\text{H}_2\text{TMPyP:NiTSPP}$  crystals**

|            | <b>x/a</b>  | <b>y/b</b>  | <b>z/c</b>  | <b>U(eq)</b> |
|------------|-------------|-------------|-------------|--------------|
| <b>Ni1</b> | 0.5         | 0.0         | 0.0         | 0.01846(17)  |
| <b>S1</b>  | 0.78314(11) | 0.46319(5)  | 0.90777(3)  | 0.0330(2)    |
| <b>S2</b>  | 0.28516(12) | 0.82066(6)  | 0.30126(3)  | 0.0398(2)    |
| <b>O1</b>  | 0.8371(4)   | 0.47518(14) | 0.86152(9)  | 0.0452(7)    |
| <b>O2</b>  | 0.6401(3)   | 0.41353(13) | 0.90986(9)  | 0.0414(6)    |
| <b>O3</b>  | 0.9128(3)   | 0.43635(13) | 0.93901(9)  | 0.0397(6)    |
| <b>O4</b>  | 0.1220(3)   | 0.78982(18) | 0.30155(9)  | 0.0442(8)    |
| <b>O5</b>  | 0.4040(3)   | 0.75778(18) | 0.31138(9)  | 0.0483(8)    |
| <b>O6</b>  | 0.3169(4)   | 0.89220(19) | 0.32988(9)  | 0.0549(9)    |
| <b>O4A</b> | 0.1570(17)  | 0.8691(10)  | 0.3174(6)   | 0.066(12)    |
| <b>O5A</b> | 0.431(2)    | 0.8339(9)   | 0.3278(9)   | 0.047(10)    |
| <b>O6A</b> | 0.2489(15)  | 0.7362(9)   | 0.2965(9)   | 0.072(11)    |
| <b>N1</b>  | 0.5918(3)   | 0.95002(14) | 0.94598(8)  | 0.0214(5)    |
| <b>N2</b>  | 0.5110(3)   | 0.89450(14) | 0.03190(8)  | 0.0202(5)    |
| <b>C1</b>  | 0.6315(4)   | 0.98732(17) | 0.90537(10) | 0.0212(6)    |
| <b>C2</b>  | 0.7117(4)   | 0.93161(18) | 0.87649(10) | 0.0249(7)    |
| <b>C3</b>  | 0.7165(4)   | 0.85904(19) | 0.89779(10) | 0.0257(7)    |
| <b>C4</b>  | 0.6394(4)   | 0.86942(17) | 0.94016(10) | 0.0217(6)    |
| <b>C5</b>  | 0.6186(4)   | 0.80620(17) | 0.97147(10) | 0.0219(7)    |
| <b>C6</b>  | 0.5632(4)   | 0.81986(17) | 0.01497(10) | 0.0219(6)    |
| <b>C7</b>  | 0.5529(4)   | 0.75750(18) | 0.04934(10) | 0.0245(7)    |
| <b>C8</b>  | 0.4988(4)   | 0.79280(18) | 0.08710(10) | 0.0244(7)    |
| <b>C9</b>  | 0.4690(4)   | 0.87724(17) | 0.07650(10) | 0.0210(6)    |
| <b>C10</b> | 0.6570(4)   | 0.72077(17) | 0.95678(10) | 0.0224(7)    |
| <b>C11</b> | 0.5853(4)   | 0.68850(18) | 0.91634(10) | 0.0228(7)    |
| <b>C12</b> | 0.6211(4)   | 0.60995(18) | 0.90183(10) | 0.0249(7)    |
| <b>C13</b> | 0.7296(4)   | 0.56227(17) | 0.92759(11) | 0.0258(7)    |
| <b>C14</b> | 0.7996(4)   | 0.59247(19) | 0.96818(11) | 0.0276(7)    |
| <b>C15</b> | 0.7635(4)   | 0.67076(18) | 0.98243(11) | 0.0260(7)    |
| <b>C16</b> | 0.4034(4)   | 0.93198(17) | 0.10690(10) | 0.0216(7)    |
| <b>C17</b> | 0.3712(4)   | 0.90472(18) | 0.15452(10) | 0.0232(7)    |
| <b>C18</b> | 0.2814(4)   | 0.83433(19) | 0.16295(11) | 0.0272(7)    |
| <b>C19</b> | 0.2545(4)   | 0.8082(2)   | 0.20719(11) | 0.0308(8)    |
| <b>C20</b> | 0.3162(4)   | 0.8541(2)   | 0.24410(11) | 0.0306(8)    |
| <b>C21</b> | 0.4029(4)   | 0.9245(2)   | 0.23685(11) | 0.0300(7)    |
| <b>C22</b> | 0.4316(4)   | 0.94880(19) | 0.19256(10) | 0.0263(7)    |
| <b>N3</b>  | 0.9068(3)   | 0.44750(14) | 0.55725(8)  | 0.0231(6)    |
| <b>N4</b>  | 0.0084(3)   | 0.60957(14) | 0.53562(8)  | 0.0229(6)    |
| <b>N5</b>  | 0.8124(3)   | 0.62882(16) | 0.74806(8)  | 0.0281(6)    |

|                                                                                           |            |             |             |            |
|-------------------------------------------------------------------------------------------|------------|-------------|-------------|------------|
| <b>N6</b>                                                                                 | 0.2263(3)  | 0.93522(15) | 0.43065(9)  | 0.0276(6)  |
| <b>C00Z</b>                                                                               | 0.1202(4)  | 0.69308(17) | 0.47386(10) | 0.0232(7)  |
| <b>C23</b>                                                                                | 0.8586(4)  | 0.36730(17) | 0.55977(10) | 0.0231(7)  |
| <b>C24</b>                                                                                | 0.7820(4)  | 0.35464(19) | 0.60255(10) | 0.0272(7)  |
| <b>C25</b>                                                                                | 0.7884(4)  | 0.42610(18) | 0.62570(11) | 0.0266(7)  |
| <b>C26</b>                                                                                | 0.8690(4)  | 0.48448(18) | 0.59746(10) | 0.0233(7)  |
| <b>C27</b>                                                                                | 0.9014(4)  | 0.56668(18) | 0.60932(10) | 0.0229(7)  |
| <b>C28</b>                                                                                | 0.9615(4)  | 0.62513(17) | 0.57946(10) | 0.0226(7)  |
| <b>C29</b>                                                                                | 0.9872(4)  | 0.71068(18) | 0.58941(10) | 0.0239(7)  |
| <b>C30</b>                                                                                | 0.0474(4)  | 0.74516(17) | 0.55201(10) | 0.0232(7)  |
| <b>C31</b>                                                                                | 0.0627(4)  | 0.68172(17) | 0.51782(10) | 0.0217(6)  |
| <b>C32</b>                                                                                | 0.8724(4)  | 0.59066(17) | 0.65739(10) | 0.0217(7)  |
| <b>C33</b>                                                                                | 0.9367(4)  | 0.5443(2)   | 0.69430(11) | 0.0282(7)  |
| <b>C34</b>                                                                                | 0.9047(4)  | 0.5644(2)   | 0.73861(11) | 0.0302(7)  |
| <b>C35</b>                                                                                | 0.7522(4)  | 0.67612(19) | 0.71367(11) | 0.0271(7)  |
| <b>C36</b>                                                                                | 0.7806(4)  | 0.65872(18) | 0.66871(10) | 0.0237(7)  |
| <b>C37</b>                                                                                | 0.7727(4)  | 0.6468(2)   | 0.79594(11) | 0.0358(8)  |
| <b>C38</b>                                                                                | 0.1581(4)  | 0.77841(17) | 0.45968(10) | 0.0226(7)  |
| <b>C39</b>                                                                                | 0.2616(4)  | 0.82934(18) | 0.48546(11) | 0.0247(7)  |
| <b>C40</b>                                                                                | 0.2942(4)  | 0.90660(19) | 0.47008(11) | 0.0278(7)  |
| <b>C41</b>                                                                                | 0.1233(4)  | 0.88909(19) | 0.40565(11) | 0.0279(7)  |
| <b>C42</b>                                                                                | 0.0880(4)  | 0.81092(18) | 0.41933(11) | 0.0266(7)  |
| <b>C43</b>                                                                                | 0.2688(5)  | 0.0177(2)   | 0.41351(13) | 0.0367(9)  |
| <b>O7</b>                                                                                 | 0.361(4)   | 0.6133(14)  | 0.2618(7)   | 0.108(9)   |
| <b>O7A</b>                                                                                | 0.3083(13) | 0.5645(7)   | 0.2338(4)   | 0.107(4)   |
| <b>O8</b>                                                                                 | 0.5795(5)  | 0.6499(2)   | 0.25828(11) | 0.0582(9)  |
| <b>O9</b>                                                                                 | 0.5970(4)  | 0.64467(18) | 0.16331(11) | 0.0591(8)  |
| <b>O10</b>                                                                                | 0.9407(4)  | 0.63950(18) | 0.17811(11) | 0.0628(9)  |
| <b>O11</b>                                                                                | 0.9253(5)  | 0.6444(2)   | 0.27533(11) | 0.0747(10) |
| *U(eq) is defined as one third of the trace of the orthogonalized U <sub>ij</sub> tensor. |            |             |             |            |

|                 |           |                 |           |
|-----------------|-----------|-----------------|-----------|
| <b>Ni1-N1</b>   | 1.960(2)  | <b>Ni1-N1</b>   | 1.960(2)  |
| <b>Ni1-N2</b>   | 1.963(2)  | <b>Ni1-N2</b>   | 1.963(2)  |
| <b>S1-O2</b>    | 1.446(3)  | <b>S1-O3</b>    | 1.453(3)  |
| <b>S1-O1</b>    | 1.454(3)  | <b>S1-C13</b>   | 1.786(3)  |
| <b>S2-O6A</b>   | 1.421(15) | <b>S2-O4A</b>   | 1.425(15) |
| <b>S2-O5A</b>   | 1.429(15) | <b>S2-O4</b>    | 1.450(3)  |
| <b>S2-O5</b>    | 1.450(3)  | <b>S2-O6</b>    | 1.457(3)  |
| <b>S2-C20</b>   | 1.785(3)  | <b>N1-C1</b>    | 1.385(4)  |
| <b>N1-C4</b>    | 1.391(4)  | <b>N2-C9</b>    | 1.391(4)  |
| <b>N2-C6</b>    | 1.395(4)  | <b>C1-C16</b>   | 1.397(4)  |
| <b>C1-C2</b>    | 1.427(4)  | <b>C2-C3</b>    | 1.341(4)  |
| <b>C2-H2</b>    | 0.95      | <b>C3-C4</b>    | 1.427(4)  |
| <b>C3-H3</b>    | 0.95      | <b>C4-C5</b>    | 1.396(4)  |
| <b>C5-C6</b>    | 1.387(4)  | <b>C5-C10</b>   | 1.501(4)  |
| <b>C6-C7</b>    | 1.436(4)  | <b>C7-C8</b>    | 1.339(4)  |
| <b>C7-H7</b>    | 0.95      | <b>C8-C9</b>    | 1.436(4)  |
| <b>C8-H8</b>    | 0.95      | <b>C9-C16</b>   | 1.389(4)  |
| <b>C10-C15</b>  | 1.401(4)  | <b>C10-C11</b>  | 1.404(4)  |
| <b>C11-C12</b>  | 1.390(4)  | <b>C11-H11</b>  | 0.95      |
| <b>C12-C13</b>  | 1.391(4)  | <b>C12-H12</b>  | 0.95      |
| <b>C13-C14</b>  | 1.390(5)  | <b>C14-C15</b>  | 1.385(4)  |
| <b>C14-H14</b>  | 0.95      | <b>C15-H15</b>  | 0.95      |
| <b>C16-C1</b>   | 1.396(4)  | <b>C16-C17</b>  | 1.495(4)  |
| <b>C17-C22</b>  | 1.400(4)  | <b>C17-C18</b>  | 1.401(4)  |
| <b>C18-C19</b>  | 1.387(4)  | <b>C18-H18</b>  | 0.95      |
| <b>C19-C20</b>  | 1.394(5)  | <b>C19-H19</b>  | 0.95      |
| <b>C20-C21</b>  | 1.381(5)  | <b>C21-C22</b>  | 1.383(4)  |
| <b>C21-H21</b>  | 0.95      | <b>C22-H22</b>  | 0.95      |
| <b>N3-C26</b>   | 1.369(4)  | <b>N3-C23</b>   | 1.376(4)  |
| <b>N3-H3A</b>   | 0.88      | <b>N4-C31</b>   | 1.374(4)  |
| <b>N4-C28</b>   | 1.377(4)  | <b>N4-H4</b>    | 0.88      |
| <b>N5-C34</b>   | 1.341(4)  | <b>N5-C35</b>   | 1.348(4)  |
| <b>N5-C37</b>   | 1.479(4)  | <b>N6-C41</b>   | 1.337(4)  |
| <b>N6-C40</b>   | 1.345(4)  | <b>N6-C43</b>   | 1.488(4)  |
| <b>C00Z-C31</b> | 1.401(4)  | <b>C00Z-C23</b> | 1.409(4)  |
| <b>C00Z-C38</b> | 1.495(4)  | <b>C23-C00Z</b> | 1.410(4)  |
| <b>C23-C24</b>  | 1.441(4)  | <b>C24-C25</b>  | 1.351(4)  |
| <b>C24-H24</b>  | 0.95      | <b>C25-C26</b>  | 1.445(4)  |
| <b>C25-H25</b>  | 0.95      | <b>C26-C27</b>  | 1.413(4)  |
| <b>C27-C28</b>  | 1.400(4)  | <b>C27-C32</b>  | 1.486(4)  |
| <b>C28-C29</b>  | 1.445(4)  | <b>C29-C30</b>  | 1.344(4)  |

|                 |            |                 |            |
|-----------------|------------|-----------------|------------|
| <b>C29-H29</b>  | 0.95       | <b>C30-C31</b>  | 1.450(4)   |
| <b>C30-H30</b>  | 0.95       | <b>C32-C36</b>  | 1.399(4)   |
| <b>C32-C33</b>  | 1.406(4)   | <b>C33-C34</b>  | 1.371(4)   |
| <b>C33-H33</b>  | 0.95       | <b>C34-H34</b>  | 0.95       |
| <b>C35-C36</b>  | 1.373(4)   | <b>C35-H35</b>  | 0.95       |
| <b>C36-H36</b>  | 0.95       | <b>C37-H37A</b> | 0.98       |
| <b>C37-H37B</b> | 0.98       | <b>C37-H37C</b> | 0.98       |
| <b>C38-C39</b>  | 1.397(4)   | <b>C38-C42</b>  | 1.398(4)   |
| <b>C39-C40</b>  | 1.373(4)   | <b>C39-H39</b>  | 0.95       |
| <b>C40-H40</b>  | 0.95       | <b>C41-C42</b>  | 1.376(4)   |
| <b>C41-H41</b>  | 0.95       | <b>C42-H42</b>  | 0.95       |
| <b>C43-H43A</b> | 0.98       | <b>C43-H43B</b> | 0.98       |
| <b>C43-H43C</b> | 0.98       | <b>O7-H7A</b>   | 0.9584(11) |
| <b>O7-H7B</b>   | 0.9584(11) | <b>O7A-H7C</b>  | 0.9584(11) |
| <b>O7A-H7D</b>  | 0.9584(11) | <b>O8-H8A</b>   | 0.9586(11) |
| <b>O8-H8B</b>   | 0.9585(10) | <b>O9-H9A</b>   | 0.9585(11) |
| <b>O9-H9B</b>   | 0.9584(11) | <b>O10-H10A</b> | 0.9585(11) |
| <b>O10-H10B</b> | 0.9585(11) | <b>O11-H11A</b> | 0.9586(11) |
| <b>O11-H11B</b> | 0.9585(10) |                 |            |

| <b>Table S5. Bond angles (°) for H<sub>2</sub>TMPyP:NiTSP crystal structure. The anisotropic atomic displacement factor exponent takes the form: <math>-2\pi^2 [ h^2 a^{*2} U_{11} + \dots + 2 h k a^* b^* U_{12} ]</math></b> |            |             |            |
|--------------------------------------------------------------------------------------------------------------------------------------------------------------------------------------------------------------------------------|------------|-------------|------------|
| N1-Ni1-N1                                                                                                                                                                                                                      | 180.0      | N1-Ni1-N2   | 90.11(10)  |
| N1-Ni1-N2                                                                                                                                                                                                                      | 89.89(10)  | N1-Ni1-N2   | 89.89(10)  |
| N1-Ni1-N2                                                                                                                                                                                                                      | 90.11(10)  | N2-Ni1-N2   | 180.0      |
| O2-S1-O3                                                                                                                                                                                                                       | 113.31(15) | O2-S1-O1    | 113.71(16) |
| O3-S1-O1                                                                                                                                                                                                                       | 111.94(17) | O2-S1-C13   | 106.27(15) |
| O3-S1-C13                                                                                                                                                                                                                      | 105.11(15) | O1-S1-C13   | 105.62(14) |
| O6A-S2-O4A                                                                                                                                                                                                                     | 114.5(8)   | O6A-S2-O5A  | 111.9(9)   |
| O4A-S2-O5A                                                                                                                                                                                                                     | 111.5(10)  | O4-S2-O5    | 112.54(18) |
| O4-S2-O6                                                                                                                                                                                                                       | 115.12(19) | O5-S2-O6    | 110.37(19) |
| O6A-S2-C20                                                                                                                                                                                                                     | 104.2(11)  | O4A-S2-C20  | 106.1(8)   |
| O5A-S2-C20                                                                                                                                                                                                                     | 108.0(12)  | O4-S2-C20   | 106.52(16) |
| O5-S2-C20                                                                                                                                                                                                                      | 106.50(16) | O6-S2-C20   | 105.05(17) |
| C1-N1-C4                                                                                                                                                                                                                       | 103.6(2)   | C1-N1-Ni1   | 128.23(19) |
| C4-N1-Ni1                                                                                                                                                                                                                      | 128.1(2)   | C9-N2-C6    | 104.3(2)   |
| C9-N2-Ni1                                                                                                                                                                                                                      | 127.90(19) | C6-N2-Ni1   | 127.8(2)   |
| N1-C1-C16                                                                                                                                                                                                                      | 125.6(3)   | N1-C1-C2    | 110.9(2)   |
| C16-C1-C2                                                                                                                                                                                                                      | 123.4(3)   | C3-C2-C1    | 107.4(3)   |
| C3-C2-H2                                                                                                                                                                                                                       | 126.3      | C1-C2-H2    | 126.3      |
| C2-C3-C4                                                                                                                                                                                                                       | 106.9(3)   | C2-C3-H3    | 126.6      |
| C4-C3-H3                                                                                                                                                                                                                       | 126.6      | N1-C4-C5    | 125.4(3)   |
| N1-C4-C3                                                                                                                                                                                                                       | 111.1(3)   | C5-C4-C3    | 123.5(3)   |
| C6-C5-C4                                                                                                                                                                                                                       | 122.3(3)   | C6-C5-C10   | 119.6(3)   |
| C4-C5-C10                                                                                                                                                                                                                      | 118.1(3)   | C5-C6-N2    | 125.9(3)   |
| C5-C6-C7                                                                                                                                                                                                                       | 123.8(3)   | N2-C6-C7    | 110.3(3)   |
| C8-C7-C6                                                                                                                                                                                                                       | 107.5(3)   | C8-C7-H7    | 126.3      |
| C6-C7-H7                                                                                                                                                                                                                       | 126.3      | C7-C8-C9    | 107.4(3)   |
| C7-C8-H8                                                                                                                                                                                                                       | 126.3      | C9-C8-H8    | 126.3      |
| C16-C9-N2                                                                                                                                                                                                                      | 126.0(3)   | C16-C9-C8   | 123.5(3)   |
| N2-C9-C8                                                                                                                                                                                                                       | 110.5(3)   | C15-C10-C11 | 117.8(3)   |
| C15-C10-C5                                                                                                                                                                                                                     | 122.0(3)   | C11-C10-C5  | 120.2(3)   |
| C12-C11-C10                                                                                                                                                                                                                    | 121.0(3)   | C12-C11-H11 | 119.5      |
| C10-C11-H11                                                                                                                                                                                                                    | 119.5      | C11-C12-C13 | 119.8(3)   |
| C11-C12-H12                                                                                                                                                                                                                    | 120.1      | C13-C12-H12 | 120.1      |
| C14-C13-C12                                                                                                                                                                                                                    | 120.1(3)   | C14-C13-S1  | 119.9(2)   |
| C12-C13-S1                                                                                                                                                                                                                     | 120.0(2)   | C15-C14-C13 | 119.8(3)   |
| C15-C14-H14                                                                                                                                                                                                                    | 120.1      | C13-C14-H14 | 120.1      |
| C14-C15-C10                                                                                                                                                                                                                    | 121.4(3)   | C14-C15-H15 | 119.3      |
| C10-C15-H15                                                                                                                                                                                                                    | 119.3      | C9-C16-C1   | 122.0(3)   |
| C9-C16-C17                                                                                                                                                                                                                     | 119.5(3)   | C1-C16-C17  | 118.5(3)   |
| C22-C17-C18                                                                                                                                                                                                                    | 117.5(3)   | C22-C17-C16 | 120.7(3)   |

|                      |          |                      |          |
|----------------------|----------|----------------------|----------|
| <b>C18-C17-C16</b>   | 121.8(3) | <b>C19-C18-C17</b>   | 121.6(3) |
| <b>C19-C18-H18</b>   | 119.2    | <b>C17-C18-H18</b>   | 119.2    |
| <b>C18-C19-C20</b>   | 119.0(3) | <b>C18-C19-H19</b>   | 120.5    |
| <b>C20-C19-H19</b>   | 120.5    | <b>C21-C20-C19</b>   | 120.6(3) |
| <b>C21-C20-S2</b>    | 119.7(3) | <b>C19-C20-S2</b>    | 119.6(3) |
| <b>C20-C21-C22</b>   | 119.7(3) | <b>C20-C21-H21</b>   | 120.2    |
| <b>C22-C21-H21</b>   | 120.2    | <b>C21-C22-C17</b>   | 121.5(3) |
| <b>C21-C22-H22</b>   | 119.3    | <b>C17-C22-H22</b>   | 119.3    |
| <b>C26-N3-C23</b>    | 107.4(2) | <b>C26-N3-H3A</b>    | 126.3    |
| <b>C23-N3-H3A</b>    | 126.3    | <b>C31-N4-C28</b>    | 107.6(2) |
| <b>C31-N4-H4</b>     | 126.2    | <b>C28-N4-H4</b>     | 126.2    |
| <b>C34-N5-C35</b>    | 119.9(3) | <b>C34-N5-C37</b>    | 120.2(3) |
| <b>C35-N5-C37</b>    | 119.9(3) | <b>C41-N6-C40</b>    | 120.5(3) |
| <b>C41-N6-C43</b>    | 119.0(3) | <b>C40-N6-C43</b>    | 120.4(3) |
| <b>C31-C00Z-C23</b>  | 127.0(3) | <b>C31-C00Z-C38</b>  | 117.5(3) |
| <b>C23-C00Z-C38</b>  | 115.4(3) | <b>N3-C23-C00Z</b>   | 126.0(3) |
| <b>N3-C23-C24</b>    | 108.9(3) | <b>C00Z-C23-C24</b>  | 125.1(3) |
| <b>C25-C24-C23</b>   | 107.4(3) | <b>C25-C24-H24</b>   | 126.3    |
| <b>C23-C24-H24</b>   | 126.3    | <b>C24-C25-C26</b>   | 107.3(3) |
| <b>C24-C25-H25</b>   | 126.3    | <b>C26-C25-H25</b>   | 126.3    |
| <b>N3-C26-C27</b>    | 125.6(3) | <b>N3-C26-C25</b>    | 109.0(3) |
| <b>C27-C26-C25</b>   | 125.4(3) | <b>C28-C27-C26</b>   | 124.6(3) |
| <b>C28-C27-C32</b>   | 118.9(3) | <b>C26-C27-C32</b>   | 116.5(3) |
| <b>N4-C28-C27</b>    | 125.0(3) | <b>N4-C28-C29</b>    | 108.7(3) |
| <b>C27-C28-C29</b>   | 126.3(3) | <b>C30-C29-C28</b>   | 107.5(3) |
| <b>C30-C29-H29</b>   | 126.2    | <b>C28-C29-H29</b>   | 126.2    |
| <b>C29-C30-C31</b>   | 107.7(3) | <b>C29-C30-H30</b>   | 126.1    |
| <b>C31-C30-H30</b>   | 126.1    | <b>N4-C31-C00Z</b>   | 126.2(3) |
| <b>N4-C31-C30</b>    | 108.4(3) | <b>C00Z-C31-C30</b>  | 125.3(3) |
| <b>C36-C32-C33</b>   | 116.3(3) | <b>C36-C32-C27</b>   | 123.0(3) |
| <b>C33-C32-C27</b>   | 120.6(3) | <b>C34-C33-C32</b>   | 120.7(3) |
| <b>C34-C33-H33</b>   | 119.6    | <b>C32-C33-H33</b>   | 119.6    |
| <b>N5-C34-C33</b>    | 121.2(3) | <b>N5-C34-H34</b>    | 119.4    |
| <b>C33-C34-H34</b>   | 119.4    | <b>N5-C35-C36</b>    | 121.3(3) |
| <b>N5-C35-H35</b>    | 119.4    | <b>C36-C35-H35</b>   | 119.4    |
| <b>C35-C36-C32</b>   | 120.6(3) | <b>C35-C36-H36</b>   | 119.7    |
| <b>C32-C36-H36</b>   | 119.7    | <b>N5-C37-H37A</b>   | 109.5    |
| <b>N5-C37-H37B</b>   | 109.5    | <b>H37A-C37-H37B</b> | 109.5    |
| <b>N5-C37-H37C</b>   | 109.5    | <b>H37A-C37-H37C</b> | 109.5    |
| <b>H37B-C37-H37C</b> | 109.5    | <b>C39-C38-C42</b>   | 116.9(3) |
| <b>C39-C38-C00Z</b>  | 122.8(3) | <b>C42-C38-C00Z</b>  | 120.3(3) |
| <b>C40-C39-C38</b>   | 120.0(3) | <b>C40-C39-H39</b>   | 120.0    |

|                      |            |                      |            |
|----------------------|------------|----------------------|------------|
| <b>C38-C39-H39</b>   | 120.0      | <b>N6-C40-C39</b>    | 121.3(3)   |
| <b>N6-C40-H40</b>    | 119.4      | <b>C39-C40-H40</b>   | 119.4      |
| <b>N6-C41-C42</b>    | 120.5(3)   | <b>N6-C41-H41</b>    | 119.8      |
| <b>C42-C41-H41</b>   | 119.8      | <b>C41-C42-C38</b>   | 120.8(3)   |
| <b>C41-C42-H42</b>   | 119.6      | <b>C38-C42-H42</b>   | 119.6      |
| <b>N6-C43-H43A</b>   | 109.5      | <b>N6-C43-H43B</b>   | 109.5      |
| <b>H43A-C43-H43B</b> | 109.5      | <b>N6-C43-H43C</b>   | 109.5      |
| <b>H43A-C43-H43C</b> | 109.5      | <b>H43B-C43-H43C</b> | 109.5      |
| <b>H7A-O7-H7B</b>    | 104.44(15) | <b>H7C-O7A-H7D</b>   | 104.44(15) |
| <b>H8A-O8-H8B</b>    | 104.42(15) | <b>H9A-O9-H9B</b>    | 104.43(15) |
| <b>H10A-O10-H10B</b> | 104.43(15) | <b>H11A-O11-H11B</b> | 104.41(15) |

| <b>Table S6. Anisotropic atomic displacement parameters (<math>\text{\AA}^2</math>) for H<sub>2</sub>TMPyP:NiTSP crystal structure</b> |                       |                       |                       |                       |                       |                       |
|----------------------------------------------------------------------------------------------------------------------------------------|-----------------------|-----------------------|-----------------------|-----------------------|-----------------------|-----------------------|
|                                                                                                                                        | <b>U<sub>11</sub></b> | <b>U<sub>22</sub></b> | <b>U<sub>33</sub></b> | <b>U<sub>23</sub></b> | <b>U<sub>13</sub></b> | <b>U<sub>12</sub></b> |
| <b>Ni1</b>                                                                                                                             | 0.0267(4)             | 0.0133(3)             | 0.0157(3)             | 0.0005(2)             | 0.0035(2)             | -0.0007(2)            |
| <b>S1</b>                                                                                                                              | 0.0451(6)             | 0.0153(4)             | 0.0396(5)             | 0.0019(3)             | 0.0143(4)             | 0.0030(3)             |
| <b>S2</b>                                                                                                                              | 0.0418(6)             | 0.0549(6)             | 0.0233(4)             | 0.0084(4)             | 0.0081(4)             | 0.0055(4)             |
| <b>O1</b>                                                                                                                              | 0.069(2)              | 0.0237(12)            | 0.0441(15)            | -0.0019(11)           | 0.0224(13)            | 0.0069(12)            |
| <b>O2</b>                                                                                                                              | 0.0437(16)            | 0.0212(12)            | 0.0599(17)            | 0.0006(11)            | 0.0095(12)            | -0.0009(10)           |
| <b>O3</b>                                                                                                                              | 0.0421(15)            | 0.0220(12)            | 0.0560(16)            | 0.0038(11)            | 0.0132(12)            | 0.0069(10)            |
| <b>O4</b>                                                                                                                              | 0.0328(15)            | 0.071(2)              | 0.0291(14)            | 0.0148(13)            | 0.0050(11)            | 0.0005(13)            |
| <b>O5</b>                                                                                                                              | 0.0432(17)            | 0.0666(19)            | 0.0357(15)            | 0.0222(13)            | 0.0076(12)            | 0.0150(14)            |
| <b>O6</b>                                                                                                                              | 0.071(2)              | 0.068(2)              | 0.0264(14)            | -0.0066(13)           | 0.0096(14)            | -0.0051(16)           |
| <b>O4A</b>                                                                                                                             | 0.055(11)             | 0.089(18)             | 0.05(3)               | -0.009(18)            | 0.005(12)             | 0.019(11)             |
| <b>O5A</b>                                                                                                                             | 0.061(9)              | 0.034(17)             | 0.04(2)               | 0.003(15)             | -0.005(12)            | 0.018(9)              |
| <b>O6A</b>                                                                                                                             | 0.10(2)               | 0.069(8)              | 0.05(3)               | -0.004(9)             | 0.007(19)             | -0.007(8)             |
| <b>N1</b>                                                                                                                              | 0.0262(15)            | 0.0172(12)            | 0.0210(12)            | 0.0013(10)            | 0.0049(10)            | -0.0009(10)           |
| <b>N2</b>                                                                                                                              | 0.0262(15)            | 0.0157(12)            | 0.0189(12)            | -0.0010(9)            | 0.0029(10)            | -0.0020(10)           |
| <b>C1</b>                                                                                                                              | 0.0273(17)            | 0.0200(14)            | 0.0165(14)            | 0.0012(11)            | 0.0042(12)            | -0.0008(12)           |
| <b>C2</b>                                                                                                                              | 0.0296(19)            | 0.0242(16)            | 0.0215(15)            | 0.0011(12)            | 0.0070(13)            | 0.0016(13)            |
| <b>C3</b>                                                                                                                              | 0.0315(19)            | 0.0218(15)            | 0.0243(15)            | -0.0009(12)           | 0.0057(13)            | 0.0028(13)            |
| <b>C4</b>                                                                                                                              | 0.0268(17)            | 0.0174(14)            | 0.0211(14)            | -0.0009(11)           | 0.0031(12)            | 0.0007(12)            |
| <b>C5</b>                                                                                                                              | 0.0261(17)            | 0.0171(14)            | 0.0227(15)            | -0.0009(12)           | 0.0013(12)            | 0.0006(12)            |
| <b>C6</b>                                                                                                                              | 0.0280(17)            | 0.0164(14)            | 0.0212(14)            | -0.0004(11)           | 0.0016(12)            | -0.0025(12)           |
| <b>C7</b>                                                                                                                              | 0.0323(19)            | 0.0169(14)            | 0.0244(16)            | 0.0020(12)            | 0.0009(13)            | 0.0004(13)            |
| <b>C8</b>                                                                                                                              | 0.0336(19)            | 0.0204(15)            | 0.0192(14)            | 0.0033(12)            | 0.0014(13)            | -0.0015(13)           |
| <b>C9</b>                                                                                                                              | 0.0257(17)            | 0.0179(14)            | 0.0195(14)            | 0.0026(11)            | 0.0004(12)            | -0.0028(12)           |
| <b>C10</b>                                                                                                                             | 0.0277(18)            | 0.0166(14)            | 0.0233(15)            | 0.0011(12)            | 0.0077(13)            | -0.0006(12)           |
| <b>C11</b>                                                                                                                             | 0.0267(18)            | 0.0202(14)            | 0.0219(15)            | 0.0027(12)            | 0.0072(13)            | 0.0024(12)            |
| <b>C12</b>                                                                                                                             | 0.0326(19)            | 0.0212(15)            | 0.0217(15)            | 0.0000(12)            | 0.0104(13)            | -0.0021(13)           |
| <b>C13</b>                                                                                                                             | 0.0305(19)            | 0.0151(14)            | 0.0330(17)            | 0.0029(12)            | 0.0144(14)            | 0.0004(13)            |
| <b>C14</b>                                                                                                                             | 0.0302(19)            | 0.0212(15)            | 0.0320(17)            | 0.0067(13)            | 0.0071(14)            | 0.0031(13)            |
| <b>C15</b>                                                                                                                             | 0.0295(19)            | 0.0225(15)            | 0.0263(16)            | 0.0028(12)            | 0.0051(13)            | -0.0005(13)           |
| <b>C16</b>                                                                                                                             | 0.0268(18)            | 0.0180(14)            | 0.0199(14)            | -0.0002(11)           | 0.0013(12)            | -0.0016(12)           |
| <b>C17</b>                                                                                                                             | 0.0289(18)            | 0.0207(15)            | 0.0204(15)            | 0.0046(12)            | 0.0062(13)            | 0.0052(13)            |
| <b>C18</b>                                                                                                                             | 0.0323(19)            | 0.0253(16)            | 0.0242(16)            | 0.0024(12)            | 0.0032(13)            | -0.0005(13)           |
| <b>C19</b>                                                                                                                             | 0.036(2)              | 0.0303(17)            | 0.0271(17)            | 0.0092(14)            | 0.0096(14)            | 0.0040(15)            |
| <b>C20</b>                                                                                                                             | 0.033(2)              | 0.0369(19)            | 0.0226(16)            | 0.0045(14)            | 0.0080(14)            | 0.0125(15)            |
| <b>C21</b>                                                                                                                             | 0.0317(19)            | 0.0349(18)            | 0.0236(16)            | -0.0035(14)           | 0.0026(14)            | 0.0088(15)            |
| <b>C22</b>                                                                                                                             | 0.0307(19)            | 0.0249(16)            | 0.0235(15)            | -0.0001(12)           | 0.0033(13)            | 0.0032(13)            |
| <b>N3</b>                                                                                                                              | 0.0308(15)            | 0.0177(12)            | 0.0213(12)            | 0.0013(10)            | 0.0054(11)            | -0.0001(11)           |
| <b>N4</b>                                                                                                                              | 0.0314(16)            | 0.0175(12)            | 0.0200(12)            | 0.0016(10)            | 0.0050(11)            | -0.0012(11)           |



|             |            |            |            |             |             |             |
|-------------|------------|------------|------------|-------------|-------------|-------------|
| <b>N5</b>   | 0.0311(16) | 0.0320(15) | 0.0214(13) | -0.0025(11) | 0.0049(11)  | -0.0070(12) |
| <b>N6</b>   | 0.0346(17) | 0.0161(12) | 0.0333(15) | 0.0040(11)  | 0.0154(12)  | 0.0007(11)  |
| <b>C00Z</b> | 0.0289(18) | 0.0178(14) | 0.0231(15) | 0.0018(12)  | 0.0033(13)  | -0.0012(12) |
| <b>C23</b>  | 0.0301(18) | 0.0171(14) | 0.0224(14) | 0.0017(12)  | 0.0058(13)  | 0.0019(12)  |
| <b>C24</b>  | 0.036(2)   | 0.0199(15) | 0.0259(16) | 0.0033(12)  | 0.0077(14)  | -0.0027(13) |
| <b>C25</b>  | 0.037(2)   | 0.0205(15) | 0.0232(15) | 0.0000(12)  | 0.0132(14)  | -0.0025(14) |
| <b>C26</b>  | 0.0309(18) | 0.0188(14) | 0.0206(15) | 0.0022(11)  | 0.0056(13)  | 0.0004(13)  |
| <b>C27</b>  | 0.0267(18) | 0.0214(15) | 0.0208(14) | 0.0004(12)  | 0.0045(12)  | -0.0005(12) |
| <b>C28</b>  | 0.0300(18) | 0.0181(14) | 0.0196(14) | 0.0011(11)  | 0.0030(13)  | 0.0003(12)  |
| <b>C29</b>  | 0.0327(19) | 0.0196(15) | 0.0195(14) | -0.0017(11) | 0.0031(13)  | 0.0007(13)  |
| <b>C30</b>  | 0.0314(18) | 0.0156(14) | 0.0227(15) | 0.0017(11)  | 0.0034(13)  | -0.0021(12) |
| <b>C31</b>  | 0.0280(17) | 0.0162(14) | 0.0211(14) | 0.0005(11)  | 0.0046(12)  | 0.0002(12)  |
| <b>C32</b>  | 0.0259(18) | 0.0185(14) | 0.0211(15) | 0.0016(11)  | 0.0063(12)  | -0.0046(12) |
| <b>C33</b>  | 0.034(2)   | 0.0252(16) | 0.0259(16) | 0.0014(13)  | 0.0052(14)  | 0.0020(14)  |
| <b>C34</b>  | 0.035(2)   | 0.0336(18) | 0.0222(15) | 0.0028(13)  | 0.0035(14)  | 0.0000(15)  |
| <b>C35</b>  | 0.0291(19) | 0.0246(16) | 0.0279(16) | -0.0040(13) | 0.0043(14)  | -0.0038(13) |
| <b>C36</b>  | 0.0296(18) | 0.0204(15) | 0.0213(14) | -0.0002(12) | 0.0038(13)  | -0.0028(13) |
| <b>C37</b>  | 0.038(2)   | 0.050(2)   | 0.0205(16) | -0.0026(15) | 0.0076(14)  | -0.0044(17) |
| <b>C38</b>  | 0.0286(18) | 0.0169(15) | 0.0230(15) | -0.0001(12) | 0.0103(13)  | 0.0023(12)  |
| <b>C39</b>  | 0.0266(18) | 0.0212(15) | 0.0267(16) | -0.0013(12) | 0.0085(13)  | 0.0023(13)  |
| <b>C40</b>  | 0.0293(19) | 0.0217(16) | 0.0333(17) | -0.0032(13) | 0.0117(14)  | 0.0005(13)  |
| <b>C41</b>  | 0.035(2)   | 0.0234(16) | 0.0262(16) | 0.0048(13)  | 0.0102(14)  | 0.0043(14)  |
| <b>C42</b>  | 0.0333(19) | 0.0213(15) | 0.0258(16) | 0.0020(12)  | 0.0082(14)  | -0.0008(13) |
| <b>C43</b>  | 0.044(2)   | 0.0193(16) | 0.048(2)   | 0.0097(14)  | 0.0160(17)  | -0.0003(15) |
| <b>O7</b>   | 0.149(19)  | 0.064(13)  | 0.111(17)  | 0.022(13)   | -0.009(15)  | -0.022(13)  |
| <b>O7A</b>  | 0.087(7)   | 0.114(8)   | 0.118(8)   | 0.049(7)    | -0.022(6)   | -0.017(6)   |
| <b>O8</b>   | 0.078(3)   | 0.055(2)   | 0.0423(19) | 0.0045(16)  | 0.0180(17)  | 0.015(2)    |
| <b>O9</b>   | 0.073(2)   | 0.0444(16) | 0.0600(19) | 0.0009(14)  | 0.0008(16)  | 0.0076(15)  |
| <b>O10</b>  | 0.081(2)   | 0.0485(17) | 0.0595(19) | -0.0143(15) | 0.0178(18)  | 0.0105(16)  |
| <b>O11</b>  | 0.112(3)   | 0.0522(19) | 0.060(2)   | 0.0091(16)  | -0.0017(19) | 0.016(2)    |

## References

---

- 1 M. Adinehnia, B. Borders, M. Ruf, B. Chilukuri, K.W.Hipps and U. Mazur, *J. Mat. Chem. C.*, 2016, **5**, 10223-10239.
- 2 D. H. Karweik and N. Winograd, *Inorg. Chem.*, 1976, **15**, 2336-2342.
- 3 J. P. Macquet, M. M. Millard and T. Theophanides, *J. Am. Chem. Soc.*, 1978, **100**, 4741-4746.
- 4 R. J. J. Jansen and H. Vanbakkum, *Carbon*, 1995, **33**, 1021-1027.
- 5 L. Silipigni, G. De Luca, Q. Quattrone, L. M. Scolaro, G. Salvato and V. J. Grasso, *Phys.: Condens. Matter.*, 2006, **18**, 5759-5772.
- 6 H. Marbach, *Acc. Chem. Res.* 2015, **48**, 2649–2658.
- 7 I. Reid, Y. Zhang, A. Demasi, A. Blueser, L. Piper, J. E. Downes, A. Matsuura, G. Hughes and K. E. Smith, *Appl. Surf. Sci.* 2009, **256**, 720–725.
- 8 G. M. Sheldrick, *SHELXS-2014, Program for Crystal Structure Solution*, University of Göttingen, 2014.
- 9 G. M. Sheldrick, *SHELXS-2014, Program for Crystal Structure Solution*, University of Göttingen, 2014.
